---

1                                   **TOXICITY PROFILE OF PARENTERAL ARTESUNATE**  
2                                   **FOLLOWING SUBACUTE TREATMENT**  
3                                   **IN RATS AND DOGS**  
4

5                   Yanjie XIONG<sup>a</sup>, Johanna S. LANG<sup>b</sup>, Susanne THUN-BATTERSBY<sup>c</sup>, Qin HUANG<sup>a</sup>

6                                   <sup>a</sup> Guilin Pharmaceutical Co., Ltd., No. 43 Qilidian Rd., Guilin City 541004, Guangxi, China

7                                   <sup>b</sup>Grانzer Regulatory Consulting & Services, 81379 Munich, Germany

8                                   <sup>c</sup>TToxConsulting, 52074 Aachen, Germany  
9

10           Subchronic data for repeated intravenous and intramuscular artesunate in animals are available in  
11           the literature for a maximum duration of 14-days. Published results of genotoxicity studies *in*  
12           *vitro* in bacteria or cells of animal or human origin and *in vivo* in animals are equivocal, with a  
13           couple of negative results following oral administration and positive results in human cells.

14           With the studies performed in rats and dogs for a treatment period of 28-days including measures  
15           of safety pharmacology, toxicokinetic evaluation and *in vivo* genotoxicity data, a comparison of  
16           toxicity and exposure of intravenous versus intramuscular artesunate for a prolonged treatment  
17           period is possible, delivering important information, when a decision between both routes has to  
18           be made for use in patients. Results of the peripheral blood micronucleus assay in rats were  
19           positive, suggesting genotoxic potential for the intravenous route of administration of artesunate,  
20           what is, beside patients, likewise relevant for production and health care personnel.

21  
22           **ABSTRACT**

23           **OBJECTIVES** The objectives of these studies were to investigate the toxicity, safety and  
24           toxicokinetics of single and multiple doses of artesunate for injection in rats and dogs.

25           **METHODS** Sprague-Dawley rats and Beagle dogs were treated intravenously or intramuscularly  
26           for 28 consecutive days with doses of up to 30 mg/kg artesunate, evaluating toxicity, kinetics,  
27           genotoxicity, and cardiovascular and central nervous safety parameters after single and 4-week  
28           repeated administrations. Furthermore, respiratory parameters were evaluated after a single  
29           intravenous administration in rats.

30           **RESULTS** Artesunate was well tolerated with no mortality and only minor effects on clinical  
31           pathology parameters. Following repeated intramuscular administration, local reactions at the  
32           injection site became evident. Signs of regenerative anaemia were evident in both rats and dogs  
33           and are attributed to the pharmacological effect of artesunate (effective against blood stages of  
34           malaria parasites). No severe toxicity or any effects on safety measures were noticed.

35           **CONCLUSIONS** The results obtained in these studies support the safe use of intravenous and  
36           intramuscular artesunate for a period beyond the commonly used three (to maximum seven) days  
37           in humans. Cardiovascular, central nervous and respiratory safety measures indicate no risk at  
38           clinically used doses.

## 41 INTRODUCTION

42 Artesunate, an artemisinin-derivative, has  
43 been used for decades in humans for the  
44 treatment of severe *falciparum* malaria,  
45 which is a uniformly lethal disease if not  
46 treated promptly with potent antimalarial  
47 drugs. The WHO recommends the use of  
48 parenteral artesunate for the treatment of  
49 severe *falciparum* malaria since 2005.<sup>1</sup>  
50 Although the mechanism of action remains  
51 to be completely elucidated, various data  
52 prove the efficacy of artesunate *in vitro*, *in*  
53 *vivo* in rodent and monkey challenge  
54 models, and in clinical and field isolates, by  
55 the number of successfully cured patients.  
56 Adsorption, distribution and elimination  
57 data are known for several routes of  
58 administration in commonly used laboratory  
59 species, including pregnant animals.  
60 Metabolism data are reported *in vitro* for  
61 animal and human cells, for animals as well  
62 as drug-drug interaction data for humans.  
63 For intravenously administered artesunate,  
64 tolerability and efficacy were investigated in  
65 rats for three consecutive days. These  
66 studies, performed by Xie and Li, evaluated  
67 known haematotoxic and potential  
68 nephrotoxic effects of high doses of  
69 artesunate in uninfected and *plasmodium*  
70 *berghei*-infected rats.<sup>2,3</sup> Using the  
71 intramuscular route of administration in rats,  
72 studies of a duration of up to 7 days are  
73 available in the literature for artesunate as  
74 well as for the active metabolite  
75 dihydroartemisinin (DHA).<sup>4,5</sup> For  
76 nonrodents, intravenous artesunate data for

77 up to 14 days of treatment in dogs and in  
78 monkeys are reported.<sup>6,7</sup>

79 Extensive work was done evaluating  
80 reproductive and developmental effects *in*  
81 *vitro*, using whole embryo cultures, in rats,  
82 rabbits, and monkeys using the oral,  
83 intravenous, intramuscular or intraperitoneal  
84 route of administration.<sup>7-26</sup> However, to date,  
85 no *in vivo* genotoxicity data for the  
86 intravenous route of administration are  
87 available in the literature.

88 During the last decade, nearly no additional  
89 work has been published to close the gap of  
90 nonclinical toxicity and safety  
91 pharmacology data for intravenous and  
92 intramuscular administered artesunate for a  
93 treatment duration beyond 14 days. In  
94 contrast, oral artesunate was investigated  
95 more recently for subchronic treatment  
96 (durations of one to three months) in mice,  
97 rats, rabbits and dogs.<sup>27,28,29,30</sup>

98 The aim of the studies presented in the  
99 following was to evaluate the toxicity of  
100 intravenous and intramuscular injected  
101 artesunate, in order to address potential risks  
102 by prolonged intravenous use, safety  
103 measures and for genotoxicity.

104  
105 **Materials and methods** Two repeated dose  
106 toxicity studies and one respiratory safety  
107 study with administration of artesunate *via*  
108 the intravenous (IV) or intramuscular (IM)  
109 route were conducted in rats and dogs.  
110 Details of the study designs are shown in  
111 Table 1.

112

113 **Table 1: Study Designs**

| Study                       | Duration                          | Routes    | Endpoints                                                                                                            |
|-----------------------------|-----------------------------------|-----------|----------------------------------------------------------------------------------------------------------------------|
| Repeated dose toxicity, rat | 28-day treatment, 28-day recovery | IV and IM | General toxicity, neuro-behavioral changes (modified Irwin Test), body temperature, genotoxicity (micronucleus test) |
| Repeated dose toxicity, dog | 28-day treatment, 28-day recovery | IV and IM | General toxicity, safety pharmacology (cardiovascular effects), body temperature                                     |
| WBP, rat                    | Single dose                       | IV        | Respiratory system                                                                                                   |

| Study | Duration | Routes | Endpoints |
|-------|----------|--------|-----------|
|-------|----------|--------|-----------|

Abbreviations: IM = intramuscularly; IV = intravenously; WBP = whole-body plethysmography.

114

115 **Test article** Artesunate (artesunic acid, 139 application volume was 5 mL/kg in rats and  
 116 ZA1200207) was obtained from Guilin 140 2 mL/kg in dogs for intravenous and  
 117 Pharmaceutical Co., Ltd. Purity of the batch 141 0.5 mL/kg (stock solution 60 mg artesunate  
 118 used was  $\geq 99\%$ . Formulations of artesunate 142 /L).  
 119 for intravenous or intramuscular 143 Purpose-bred conventional naïve Beagle  
 120 administration were prepared using sodium 144 dogs, 6-10 months of age (5-10 kg bw), and  
 121 bicarbonate as solvent (60 mg/mL) for the 145 specific pathogen-free Sprague-Dawley rats,  
 122 stock solution, and dilutions were made with 146 6-9 weeks of age (males: 180-300 g bw;  
 123 sodium chloride to the final required 147 females: 160-200 g bw) were included in the  
 124 concentrations for injections. Concentration 148 studies. The animals were received from  
 125 and stability of the test item in the dosing 149 licensed providers, quarantined and  
 126 formulations were analysed in representative 150 acclimatised for at least 5 (rats) or 14 days  
 127 samples from the animal studies by using an 151 (dogs) before inclusion into the studies. 21  
 128 HPLC method, validated compliant with 152 dogs and 92 rats of either sex were randomly  
 129 international guidelines and methods. 153 assigned (based on body weights) to the five  
 130 **Animal studies** Dose levels were selected 154 groups (n=3 dogs/sex; n=10 rats/sex) by  
 131 based on a preliminary 5-day repeated 155 using a Provantis module for grouping.  
 132 dosing study in rats. For the repeated dose 156 Additional animals (see Table 2) were kept  
 133 toxicity studies in rats and dogs, intravenous 157 for a recovery period of 4 weeks or used for  
 134 doses of 3, 10, 30 mg/kg/d and an 158 TK blood samplings in rats. Animals were  
 135 intramuscular dose of 30 mg/kg/d were 159 treated for 28 consecutive days  
 136 selected. Control animals received the 160 intravenously into the tail vein (rats) or into  
 137 vehicle (mixture of sodium bicarbonate and 161 peripheral veins of the limbs (dogs) or  
 138 sodium chloride) by IV injection. The 162 intramuscularly into the quadriceps femoris.

163

164

**Table 2: Repeated Dose Toxicity Groups and Numbers of Animals**

| Dose       | Route | Rat (N per sex) |          |    | Dog (N per sex) |          |
|------------|-------|-----------------|----------|----|-----------------|----------|
|            |       | Main            | Recovery | TK | Main            | Recovery |
| Control    | IV    | 10              | 5        | 3  | 3               | 2        |
| 3 mg/kg/d  | IV    | 10              | -        | 6  | 3               | -        |
| 10 mg/kg/d | IV    | 10              | -        | 6  | 3               | -        |
| 30 mg/kg/d | IV    | 10              | 5        | 6  | 3               | 2        |
| 30 mg/kg/d | IM    | 10              | 5        | 6  | 3               | 2        |

165

Abbreviations: IM = intramuscular; IV = intravenous; N = number; TK = toxicokinetic.

166

167 The animals were group housed by sex in 172 designated procedures. Room temperature  
 168 plastic solid-bottom cages ( $\leq 5$  rats/cage) or 173 was kept between 18-26°C (dogs) or 20-  
 169 in stainless steel cages (dogs), with single 174 26°C (rats) with a relative room humidity of  
 170 housing for collection of feces and urine 175 between 40 and 70%, air changes  $> 8/h$   
 171 samples, and for dogs additionally during 176 (dogs) or 15/h (rats), and a 12-hour

177 light/dark cycle. Dogs were fed with approx.  
178 250 g Dog Maintain Feed per day, and rats  
179 received SPF Rodent Maintenance Feed *ad*  
180 *libitum*. Animals were provided with  
181 purified water prepared in-house in the  
182 facility *ad libitum*. A pre-test health  
183 screening by a veterinarian was conducted  
184 for all animals used in the studies.

185 Animals (rats and dogs) were observed once  
186 daily for mortality and twice (during  
187 treatment) or once (during recovery) daily  
188 for clinical findings (study procedures are  
189 listed chronically in supplementary Table 3).  
190 Body weights were recorded once before  
191 dosing and once weekly thereafter, and body  
192 weight gains calculated. Food consumption  
193 was checked once daily in dogs and at least  
194 once weekly in rats, and average food  
195 consumption (g/animal/day) calculated for  
196 rats. All animals (rats and dogs) were  
197 subjected to ophthalmologic examinations  
198 prior to first dose and at the end of the  
199 treatment and recovery periods.

200 Blood for clinical pathology examinations  
201 was collected twice before the first dose in  
202 dogs, and on D28 or D29 and D56 (recovery  
203 period) in rats and dogs. For clinical  
204 chemistry, blood was collected into tubes  
205 with separation gel and coagulant,  
206 centrifuged to obtain serum and analyzed  
207 with a Hitachi-7180 Automatic Clinical  
208 Analyzer. Samples for haematology or  
209 coagulation analysis were collected into  
210 tubes containing EDTA-K2 or citrate  
211 sodium as anticoagulant and analyzed by the  
212 Sysmex XN-1000V or Sysmex CS-5100  
213 Automated Analyzers. Urine and faeces  
214 (dogs only) were collected before dosing  
215 (dogs only) and once at the end of the dosing  
216 and recovery periods. Urine samples were  
217 analysed by the URIT-500B Urine Analyzer  
218 and dog faeces were analysed for occult  
219 blood in addition. Parameters determined are  
220 listed in supplementary Table 5.

221 Blood for determination of artesunate or its  
222 main metabolite dihydroartemisinin (DHA)  
223 was collected prior to dosing and 5, 30 min,  
224 1, 3, 6 and 24 hours after dosing on D1. On  
225 D27 (dogs) or D28 (rats), samples were  
226 collected from all animals prior to dose and  
227 at 15, 30, 45 min, 1, 3, and 6 hours post  
228 dose. Blood was collected into pre-cooled  
229 heparinized tubes and stabilized by adding  
230 40 mg/mL sodium fluoride (NaF) in water.  
231 Sample analysis was done using LC-  
232 MS/MS, validated compliant with  
233 international guidelines (ICH) and methods.  
234 Primary TK parameters, maximum plasma  
235 concentration ( $C_{max}$ ), time point of  $C_{max}$   
236 ( $T_{max}$ ), and area under the concentration-  
237 time curve ( $AUC_{(0-t)}$ ), were calculated.

238 All rats and dogs scheduled for necropsy at  
239 the end of the treatment and recovery  
240 periods were anaesthetized (approx. 30-  
241 45 mg/kg pentobarbital sodium or ketamine  
242 in combination with xylazine [mixture of  
243 20 mg/kg / 10 mg/kg for dogs; 90 mg/kg /  
244 6 mg/kg for rats]), exsanguinated and  
245 subjected to macroscopic pathological  
246 examinations (see supplement Table 4), and  
247 organ weights analysis. Organs and tissues  
248 (see supplement Table 4) were taken for  
249 histopathological investigations (reported  
250 elsewhere). In addition, bone marrow  
251 samples were collected from the femurs of  
252 rats and from the ribs of dogs and smears  
253 were prepared for analysis.

254 **Safety pharmacology (cardio-vascular,**  
255 **neuro-behavioral and respiratory)** ECG  
256 parameters (see supplement Table 4) and  
257 body temperature were determined on D1  
258 (1.5 h post dose), D2, D27 (prior to dose and  
259 1.5 h post dose) and D28 as well as D56  
260 (recovery period) by non-invasive telemetry  
261 in all dogs.

262 Rats were investigated using a modified  
263 Irwin Test (see supplement Table 6) to  
264 check for neuro-behavioural effects and  
265 measurements of body temperature 5, 30,

266 60, 240 minutes and 24 hours after the first  
267 and second to last dose.

268 A separate study to evaluate effects on  
269 respiratory parameters (see supplement  
270 Table 4) was conducted in Sprague-Dawley  
271 rats. Based on the 5-day preliminary toxicity  
272 study, dose levels of 10, 30 and 60 mg  
273 artesunate/kg bw were selected for single  
274 intravenous administration. Five animals per  
275 sex and group received a dose volume of  
276 5 mL/kg into the tail vein. Control animals  
277 received the vehicle. Body weights were  
278 recorded on the day of dosing and  
279 respiratory function measurements (see  
280 supplementary Table 4) were evaluated by  
281 whole-body plethysmography with data  
282 acquired immediately for baseline  
283 (90 minutes before dosing). Post-dosing data  
284 were generated at 10 min, 0.5, 1, 4 and 24  
285 hours after dosing. Animals were stratified  
286 to five evaluation blocks, with at least one  
287 animal of each group represented in each  
288 block of measurement.

289 **Genotoxicity** At the end of the dosing  
290 period (D29), the first five rats/sex/group  
291 were selected from scheduled necropsy  
292 animals for micronucleus analysis using the  
293 MicroFlow<sup>®</sup> PLUS Rat Blood Micronucleus  
294 Analysis Kit (Litron Laboratories, USA). In  
295 peripheral blood, approximately 20,000  
296 CD71 high-positive reticulocytes (RET)  
297 were counted for each animal to determine  
298 the number of micronucleated reticulocytes

331

## 332 **RESULTS**

333

334 **Formulation analysis** Results of the  
335 validation study demonstrated good  
336 specificity of the HPLC method, and DHA  
337 did not interfere with the detection of  
338 artesunate. The calibration curves of  
339 artesunate showed good linearity in the  
340 range of 10~80 µg/mL, acceptance criteria  
341 for sensitivity, carryover, intra-accuracy,

299 (MN-RET) and frequencies (%MN-RET).  
300 As a measurement of cytotoxicity, the  
301 percent of reticulocytes (%RET) were  
302 calculated from total erythrocytes. Negative  
303 and positive controls were included and  
304 mean and standard deviation of %RET and  
305 %MN-RET calculated.

306 **Data and statistical analysis** Statistical  
307 comparison was performed between  
308 treatment groups and control groups. Group  
309 means and standard deviations were  
310 calculated, separately for each sex using the  
311 statistical methods described in  
312 supplementary

313 Table 7. The data of mortality, clinical  
314 observations, food consumption,  
315 ophthalmology, urinalysis, occult blood in  
316 feces (dogs only) and bone marrow smears  
317 were not statistically analyzed.

318 **Ethics and compliance statements** All  
319 animal work in this study was conducted  
320 complying with the “Guide for Care and Use  
321 of Laboratory Animals” issued in 2011 by  
322 the National Research Council, USA and  
323 protocols, amendment(s) and procedures  
324 reviewed and approved by the Institutional  
325 Animal Care and Use Committee (IACUC).  
326 The studies were conducted according to  
327 OECD GLP regulations in a GLP certified  
328 laboratory and in consideration of  
329 internationally accepted testing guidelines  
330 (OECD, ICH) for preclinical safety studies.

342 precision and homogeneity were met. The  
343 dose formulations of artesunate and post-  
344 processed samples were stable during the  
345 period and conditions used.

346 Representative samples for formulation  
347 analysis were taken in all three studies on  
348 the first, second and last day of formulation.  
349 The results of system suitability tests, stock  
350 solution comparisons, performance checks  
351 and standard curves etc. met the requirement  
352 of the analytical method. No artesunate was

353 detected in the control dose formulation of  
354 all three studies. Measured concentrations of  
355 the dose formulation samples of the first  
356 preparation in the rat study were out of  
357 specification (88.5, 88.4, 87.4 or 82.1%,  
358 respectively of the nominal concentrations)  
359 in the low, mid and high dose IV and the  
360 undiluted stock for IM preparations,  
361 including backup samples used for re-  
362 analysis. The mean measured concentrations  
363 of artesunate dose formulations from the  
364 second preparation, as well as all other  
365 samples determined for the rat and dog  
366 studies were within 90.0%-110.0% of the  
367 nominal concentrations, with a relative  
368 deviation of no more than 2.0%, and thus  
369 within the acceptance criteria.

370 ***In vivo* examinations** None of the animals  
371 died before scheduled termination. Clinical  
372 signs indicative of general toxicity were not  
373 observed in rats and dogs. In rats, swelling  
374 at the injection sites was observed (first time  
375 observed on D10) in all male and female  
376 animals of the group receiving intramuscular  
377 injections (30 mg/kg/d). Swelling of the  
378 hind limb (left and/or right) was seen in 8 of  
379 15 male and 10 of 15 female rats  
380 (accompanied by limping in 4 females) and  
381 in all dogs during the second half of the  
382 treatment period. All swellings recovered  
383 during the treatment-free period. One male  
384 dog showed additionally decreased activity  
385 (D12-28), which was associated with an  
386 abscess and injury on the right hind limb and  
387 limping.

388 In rats, mean body weights and body weight  
389 gains were not affected in male and female  
390 animals receiving intravenous doses of 3, 10  
391 and 30 mg/kg/d in comparison to control  
392 animals, while intramuscular treated animals  
393 gained less body weight (males statistically  
394 significant D7 to D35, females below 10%),  
395 caused by a significantly reduced food  
396 consumption (males whole treatment period,  
397 females D17-21). The food consumption and

398 body weight (partly in males) completely  
399 recovered.

400 In dogs, body weights were slightly (below  
401 5% difference) lower in female animals of  
402 the high dose IV and IM treatment groups  
403 (30 mg/kg/d) compared to the other  
404 treatment groups and the control group. In  
405 the female IM group, occasionally food was  
406 left over. Body weights recovered in females  
407 of the IM group, but remained slightly lower  
408 in females of the high dose IV group.

409 No ophthalmological effects were observed  
410 in rats and dogs at any time point. Following  
411 single and repeated dosing, body  
412 temperature was not affected in both species.

413 **Clinical pathology** In rats, haematological  
414 changes affected the animals of the 10 and  
415 30 mg/kg/d IV group and of the 30 mg/kg/d  
416 IM group. Red blood cell parameters  
417 indicative of anaemia (red blood cell count  
418 RBC, hemoglobin HGB and hematocrit  
419 HCT) were about 50% decreased with a  
420 concomitant 2-4-fold increase of the  
421 reticulocytes (RET). The interrelated  
422 parameters (MCV, MCH, MCHC and  
423 RDW) were also affected. In addition, the  
424 number of platelets (PLT) and the platelet  
425 Crit (PCT) were up to 50% increased in  
426 these groups. The number of WBCs was  
427 increased reaching statistical significance  
428 (10 mg/kg/d only males), by an increase of  
429 the absolute and relative neutrophils  
430 (NEUT, 2-4-fold), lymphocytes (LYMPH,  
431 up to 2-fold), monocytes (MONO) and  
432 basophils (BASO, both up to 10-fold). The  
433 thrombin time (TT) and the activated partial  
434 thromboplastin time (APTT) but not the  
435 prothrombin time (PT) were statistically  
436 significantly shortened. Fibrinogen was  
437 statistically significantly increased in the IM  
438 (male and female) treatment group. The  
439 absolute and relative numbers of nucleated  
440 red blood cells were up to 200-fold  
441 increased in a dose-related manner in all  
442 artesunate groups. Apart, in the low dose

443 group treated with 3 mg/kg/d IV, only a few  
444 of the interrelated parameters were affected  
445 (see supplementary Table 8). Except the  
446 RDW in males and the MCV and MCH in  
447 females of the high dose IV and IM groups,  
448 all changes recovered.

449 Clinical chemistry examination revealed a  
450 statistically significant decrease of  
451 cholesterol (CHOL) levels in male rats in the  
452 mid and high dose IV groups (10 and  
453 30 mg/kg/d) and the IM group (30 mg/kg/d),  
454 while triglyceride (TG, excluding females of  
455 the 10 mg/kg/d group), total bilirubin (T-  
456 BIL) and direct bilirubin (D-BIL, bilirubin  
457 including females of the 3 mg/kg/d group)  
458 values were increased (statistically  
459 significant in the IM group). Total bile acids  
460 (TBA) and phosphate (P) were increased in  
461 male and female animals of the mid (only P)  
462 and high dose IV and IM groups, reaching  
463 statistical significance only in males. The  
464 level of albumin (ALB) was decreased in  
465 animals (statistically significantly in  
466 females) of the IM group with statistically  
467 significant elevated globulin (GLO) values  
468 and a decreased ratio of A/G in male and  
469 female rats. Additional statistically  
470 significant findings in the treatment groups  
471 compared to controls appear to be incidental  
472 and not related to treatment with artesunate.  
473 For details please see supplementary Table  
474 10. Except P and TBA (still increased in  
475 males of the IM group), all parameters  
476 completely recovered.

477 As observed in rats, haematological  
478 parameters indicative of anaemia were  
479 affected in dogs. The values of RBC, HGB,  
480 HCT were ~30-40% decreased in animals of  
481 the IV (10, 30 mg/kg/d) and IM  
482 (30 mg/kg/d) treatment groups. MCH,  
483 MCHC, PLT, and PDW were affected only  
484 slightly and not in all groups. The effect on  
485 RET was not as clear cut as in rats, with 2-3-  
486 fold increased values in the low and mid  
487 dose groups and ~50-70% decreased levels  
488 in the high dose IV and IM treatment

489 groups. However, MPV was increased in the  
490 mid and high dose IV and the IM groups.  
491 For details please see supplementary Table  
492 9. The effects on white blood cell  
493 parameters did not indicate a clear effect,  
494 also pre-treatment WBCs showed quite  
495 some variability. The NEUTs were  
496 minimally increased, the absolute and  
497 relative MONOs about 3-fold increased, and  
498 EOSs minimally decreased. As observed in  
499 rats, the absolute and relative numbers of  
500 nucleated red blood cells (NRBCs) were up  
501 to 300-fold increased in all artesunate  
502 groups. In contrast to rats, coagulation  
503 parameters (PT, APTT and TT) were not  
504 affected by the treatment in dogs. The only  
505 finding observed was an increase (partially  
506 statistically significant) of the fibrinogen  
507 values in the high dose IV and IM groups.  
508 Except fibrinogen levels (lower in males, but  
509 higher in females of the 30 mg/kg/d IV and  
510 IM groups) all hematological parameters  
511 recovered back to control or baseline values.

512 Aspartate aminotransferase (AST), alkaline  
513 phosphatase (ALP except females of the IM  
514 group), LDH (only females) and CK  
515 (excluding males of the high dose IM group)  
516 were increased in the 30 mg/kg/d IV and IM  
517 groups. T-BIL values were statistically  
518 significantly increased and above the range  
519 of pre-dose level in the 30 mg/kg/d IV  
520 group. For details please see supplementary  
521 Table 11. Further affected parameters were  
522 creatinine and potassium levels (statistically  
523 significantly decreased only in male dogs of  
524 the IM group), and decreased calcium levels  
525 in females in the 10 or 30 mg/kg/d IV group  
526 and the IM group. ALB was decreased, and  
527 globulin increased with affected A/G ratios  
528 in males of the IM treatment group (the  
529 same as observed in the rats), while this  
530 effect was seen in the high dose IV males to  
531 a lower degree. A trend towards lower ALB  
532 and higher GLO as well as lower A/G ratios  
533 was seen in females of these dose groups  
534 (30 mg/kg/d IV or IM). Females of the IM

535 treatment group showed also a statistically  
536 significant increase (above control and pre-  
537 dose ranges) of amylase. A complete  
538 recovery was observed for all the affected  
539 parameters, except ALP and CK (still higher  
540 in males of the IM group), and CREA  
541 (higher in males of the 30 mg/kg/d IV and  
542 IM groups).

543 No treatment-related findings were observed  
544 in urinalysis in male and female rats and  
545 dogs. No occult blood was determined in the  
546 faeces of dogs.

547 **Post-mortem evaluations** Terminal body  
548 weights at necropsy were lower in the IM  
549 treatment group (30 mg/kg/d). Liver weights  
550 were increased in the 10 and 30 mg/kg/d IV  
551 groups and the IM group (absolute or  
552 relative, statistically significant in the  
553 30 mg/kg/d groups), and marginally in both  
554 sexes of the low dose group (3 mg/kg/d).  
555 Absolute and relative spleen weights were  
556 statistically significantly increased in the  
557 mid and high dose IV and the IM groups.  
558 Heart weights (absolute and relative) were  
559 increased in the high dose IV group. In  
560 addition, a few statistically significant  
561 differences were observed: decreased  
562 absolute and relative thymus weights and  
563 increased relative testes weights in males of  
564 the IM group. For details see supplementary  
565 Table 12. Increased spleen weights (both  
566 sexes), in females of the IM group increased  
567 liver weights and in males of the IM group  
568 decreased kidney weights showed no or  
569 incomplete recovery.

570 At the end of the treatment period, no  
571 macroscopic observations were noted in  
572 male and female rats of the control and low  
573 dose IV groups (3 mg/kg/d). Macroscopic  
574 findings of enlarged spleen were observed in  
575 in 3/10 males in the 10 mg/kg/d IV group,  
576 7/10 males and 5/10 females in the  
577 30 mg/kg/d IV group and 7/10 males and  
578 6/10 females in the 30 mg/kg/d IM dose  
579 group. In addition, enlarged administration

580 sites (5/10 males) and crusts (1/10 males) as  
581 well as red discoloration at the  
582 administration site (1/10 females) were  
583 observed in rats of the IM dose group. At the  
584 end of the recovery period, no macroscopic  
585 findings were observed in any of the  
586 animals.

587 In dogs, terminal body weights at necropsy  
588 were lower without dose-relation in females  
589 of all dose groups. Absolute and relative  
590 spleen and liver (males only) weights were  
591 dose-dependently increased in the 10 and  
592 30 mg/kg/d IV groups and the IM group.  
593 Absolute heart weights were not affected in  
594 male animals, while they were dose-  
595 dependently lower in female animals of all  
596 dose groups (including relative weights). For  
597 details see supplementary

598 Table 13. No or incomplete recovery was  
599 observed for liver and spleen weights (still  
600 higher in male animals of the high dose IV  
601 and IM groups). In female animals, heart  
602 and liver weights were higher in the high  
603 dose IV group and spleen weights were still  
604 higher in the IM group.

605 Macroscopic examination of dogs at the end  
606 of the treatment period did not reveal any  
607 findings in animals of the IV treatment  
608 groups (3, 10, 30 mg/kg/d). All three male  
609 and female animals of the IM group  
610 (30 mg/kg/d) showed enlargements at the  
611 administration sites, and one male animal  
612 showed injury at the administration site in  
613 addition. No further macroscopic findings  
614 were observed. At the end of the recovery  
615 period, no macroscopic findings were  
616 observed in any of the animals.

617 Bone marrow analysis revealed no  
618 treatment-related findings in rats and dogs of  
619 the control and low dose IV group  
620 (3 mg/kg/d). In all rats and dogs of the mid  
621 and high dose IV (10 or 30 mg/kg/d) and the  
622 IM group (30 mg/kg/d) groups, erythroid  
623 dysplasia was noted and the granulocyte to  
624 erythroid ratio was inverted (GE ratio <1: 1)



625 characterized by active proliferation of bone  
626 marrow, and/or increased segmentation cells  
627 (rats only) and erythron, and/or relatively  
628 decreased granulocytes and lymphocytes. In  
629 dogs, hemophagocytic cells were observed  
630 in most of the smears (16/18 cases).  
631 Furthermore, increased erythroblastic islets  
632 were noted in 4 of 20 rats of the IM dose  
633 group, but not in the IV dose group animals.  
634 In addition, for one dog of the IM group, the  
635 GE ratio was 12.14:1 with significantly  
636 decreased erythroid hyperplasia, increased  
637 granulocytes (mainly neutrophile  
638 granulocytes), high proportions of naked  
639 nuclei in megakaryocytes, and a trend of  
640 stagnated hematopoietic function. In another  
641 dog of this group, the quality of smear was  
642 poor and the smear was thick; the proportion  
643 of naïve granulocytes in granulocytes was  
644 increased. In two dogs of the high dose IV  
645 group (30 mg/kg/d), and single rats of the  
646 large 10 mg/kg/d IV group and the IM  
647 group, smudge cells were observed.

648 **Toxicokinetics** All samples for the control  
649 group in rats and dogs on the first day of  
650 dosing (D1) and at the end of the treatment  
651 period (D28 rat, D27 dog) were below the  
652 quantitative lower limit of detection  
653 (10.00 ng/mL). The TK results for rats and  
654 dogs are presented in detail in supplement  
655 Table 14 and Table 15.

656 As expected after intravenous injection of  
657 artesunate,  $C_{max}$  was obtained at the first  
658 sampling time point 5 minutes after dosing  
659 in rats and dogs. Artesunate was rapidly  
660 metabolised to DHA within minutes after  
661 intravenous injection and  $C_{max}$  was also  
662 observed at the first sampling time point of 5  
663 minutes in all IV dose groups (3, 10,  
664 30 mg/kg/d), except in the high dose IV  
665 group (30 mg/kg/d) at the end of the  
666 treatment period, where  $C_{max}$  was  
667 determined 15 minutes after dosing. After  
668 IM injection of artesunate (30 mg/kg/d),  
669  $C_{max}$  levels were reached within 5 (rats) and  
670 up to 15 (dogs) minutes after dosing, but

671 metabolism to DHA was somewhat slower  
672 with  $T_{max}$  levels achieved within the first 30  
673 minutes after dosing.

674 In rats, the increase of artesunate  $C_{max}$  was  
675 almost dose-proportional between the 3 and  
676 10 mg/kg/d groups (range 2.9-4.9), and  
677 higher than dose proportional between the  
678 10 and 30 mg/kg/d IV groups (range 5.9-14).  
679 With respect to DHA, the increase of the  
680 metabolite levels in the IV dose groups  
681 reflect the increase of doses in an almost  
682 proportional way. Animals of the IM dose  
683 group treated with 30 mg/kg/d showed lower  
684  $C_{max}$  levels than in the high dose IV group  
685 (30 mg/kg/d). With the exception of D1  
686 values in females (15%), plasma levels of  
687 males and females were about 62-69% lower  
688 in the IM group. This is also reflected in the  
689 levels of DHA which were about 55-78%  
690 lower.

691 Although the reanalysis of artesunate dosing  
692 solutions on the first day of dosing (D1) in  
693 rats was only about 82-88% of nominal, this  
694 was not reflected in the  $C_{max}$  levels of  
695 female animals of all dose groups and routes  
696 and in the male 30 mg/kg/d IV and IM  
697 groups. All  $C_{max}$  levels were lower after 28  
698 days of treatment with artesunate, except in  
699 low and mid dose IV male rats (3 or  
700 10 mg/kg/d) which were higher than the D1  
701  $C_{max}$  values.

702 For artesunate on D1 in rats, AUCs could  
703 only be calculated for the IM dose group  
704 (30 mg/kg/d) because most of the data at the  
705 various time points were below the limit of  
706 detection for the IV dose groups due to the  
707 fast metabolism of artesunate to DHA. In  
708 general, AUCs for artesunate and DHA were  
709 lower than D1 levels after 28 days of  
710 treatment with 30 mg/kg/d IM (see Figure  
711 1). In the IV dose groups, AUCs increased  
712 with dose, and lower values were seen in  
713 female animals in the low and mid dose IV  
714 groups (3, 10 mg/kg/d) compared to male  
715 animals, while there was no difference

716 between male and female animals of the 720 (3 mg/kg/d), the AUCs for DHA were  
717 high dose IV and IM dose groups 721 somewhat lower on D28 than at the start of  
718 (30 mg/kg/d). In animals of all treatment 722 dosing on D1.  
719 groups, except males of the low dose group

723

724 **Figure 1: Comparison of plasma exposure in rats**

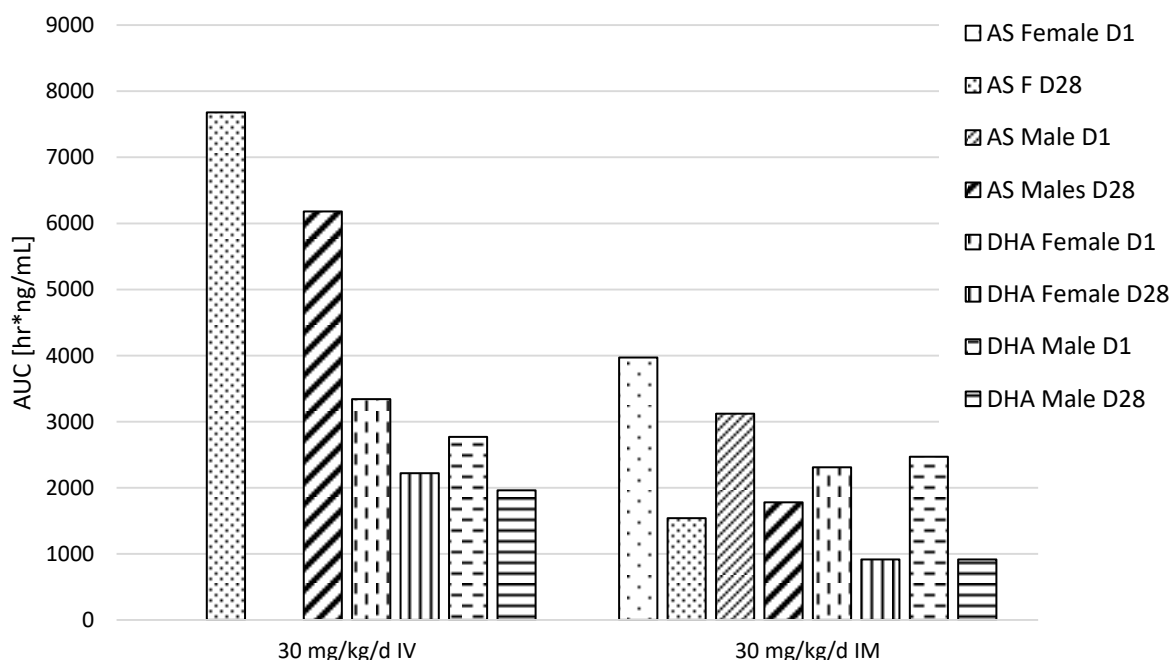

725 Exposure in terms of AUC is displayed for female and male rats after a single (D1) and repeated (D28) intravenous  
726 (IV) or intramuscular (IM) treatment with 30 mg artesunate/kg bw/day for artesunate (AS, left four bars per dose  
727 group) and its main metabolite dihydroartemisinin (DHA, right four bars per dose group). No AUC was calculated  
728 for males and females on the first day of treatment (D1) for artesunate due to fast metabolism to DHA. For the last  
729 sampling, additional early sampling time points were included, to enable calculating AUC values.  
730

731

732 In dogs, plasma levels of artesunate ( $C_{max}$  746 group.  $C_{max}$  values were in the range of 64 to  
733 and AUCs) were higher than in rats. There 747 92% and AUCs in the range of 43 to 74%.

734 was no clear difference between D1 and D27 748 The  $C_{max}$  levels of the metabolite DHA in  
735 for the IV groups (3, 10, 30 mg/kg/d), but 749 dogs were almost in the same range as in  
736 the D27 plasma levels were lower in the IM 750 rats with the exception of the 30 mg/kg/d IV  
737 dose groups (30 mg/kg/d) as compared to 751 group, for which the levels were lower in  
738 D1.  $C_{max}$  and AUC increased slightly higher 752 dogs than in rats. The increase in  $C_{max}$  and  
739 than dose proportional (4.1-9.2) with a 753 AUC was either dose proportional in  
740 slightly lower increase between the low and 754 females on D27 or less than dose  
741 mid dose IV females on D27 ( $C_{max}$ : 2.4, 755 proportional (range 2.1-2.7, 2.5-3.8,  
742 AUC 2.1). As observed in rats, plasma 756 respectively) in most cases. The IM  $C_{max}$   
743 levels in dogs ( $C_{max}$  and AUC) were lower 757 level of DHA in animals treated with  
744 in the IM group treated with 30 mg/kg/d 758 30 mg/kg/d in comparison to the  
745 than in the corresponding high dose IV 759 corresponding high dose IV group were  
760 about 29-68% lower. However, AUCs were

761 higher in the IM dose group compared to IV 763 (range 3-12%) and lower in males on D27  
762 in females on D1 and D27 and males on D1 764 (16%, see Figure 2).

765

766 **Figure 2: Comparison of plasma exposure in dogs**

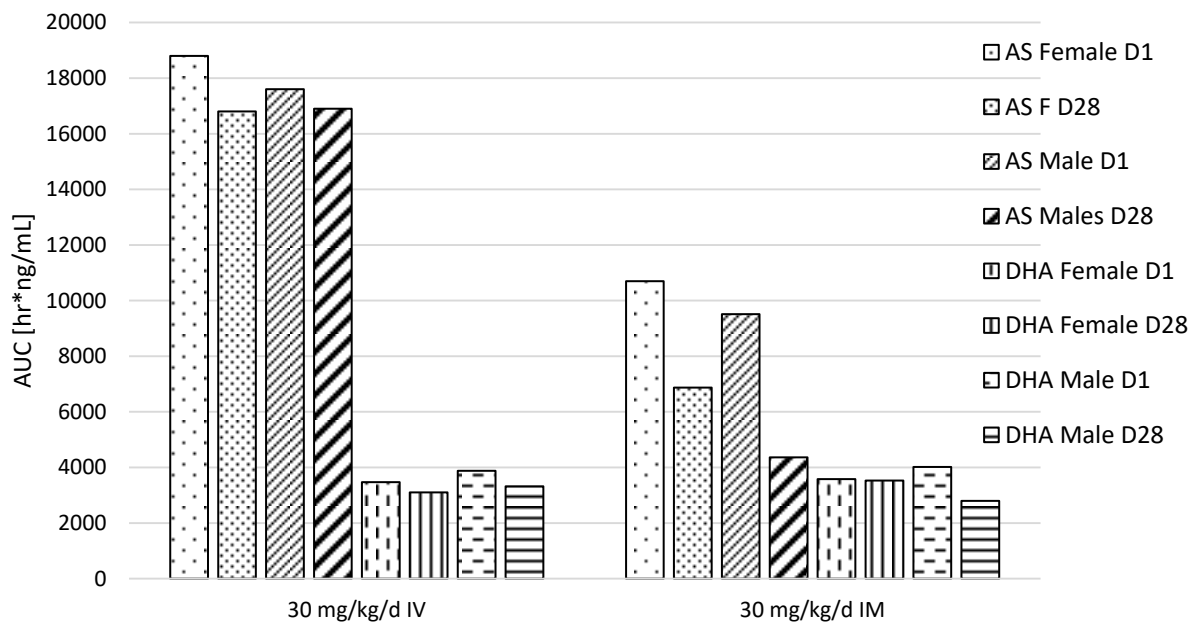

767

768 Exposure in terms of AUC is displayed for female and male dogs after a single (D1) and repeated (D27) intravenous  
769 (IV) or intramuscular (IM) treatment with 30 mg artesunate/kg bw/day for artesunate (AS, left four bars per dose  
770 group) and its main metabolite dihydroartemisinin (DHA, right four bars per dose group).

771

772 Results did not indicate an obvious gender  
773 differences between artesunate and DHA  
774 levels in male and female rats and male and  
775 female dogs.

776 **Safety pharmacology** Cardio-vascular  
777 safety was investigated in male and female  
778 dogs on D1 (1.5 h post dose) and D2 and on  
779 D27 (prior to dose and 1 h post dose) and  
780 D28 and D56 (recovery period). No  
781 treatment or test item-related effect were  
782 observed in animals in the IV or IM  
783 treatment groups in comparison to the  
784 control group. PR and RR intervals, wave  
785 duration, QRS duration, and QT interval,  
786 heart rate and QTcv were within normal  
787 limits for all groups and no pathologic  
788 arrhythmias were noted at any of the time  
789 points. One individual statistically  
790 significant increase of the corrected QT  
791 interval (9.4%) observed in female animals

792 of the high dose IM group (30 mg/kg/d) on  
793 D28 of the study period can be regraded as  
794 incidental because this value was in the  
795 range of the values observed on D27 pre-  
796 dose and 1 hour post-dose.

797 Neuro-behavioural assessments were  
798 conducted in male and female rats pre-dose  
799 and at several time points (5, 30, 60 and 240  
800 minutes and 24 hours) after the first (D1/2)  
801 and second to last dose (D27/28) by  
802 applying a modified Irwin screen. No  
803 treatment or test item-related findings were  
804 observed in animals of the treatment groups  
805 in comparison to control animals.

806 In a separate study, respiratory safety was  
807 investigated by whole-body  
808 plethysmography in male and female rats  
809 treated with a single intravenous (10, 30 or  
810 60 mg/kg) artesunate injection prior to

811 dosing and at several intervals post-dose (10  
812 min, 0.5, 1, 4 and 24 hours). The results did  
813 not indicate a test item or treatment-related  
814 effect on the tidal volume, minute volume  
815 and respiratory rates. 10 minutes following  
816 administration, respiratory parameters were  
817 increased in all animals independent of the  
818 treatment, some becoming statistically  
819 significant compared to their respective pre-  
820 dose values. All values returned back to  
821 baseline 0.5 to 1 hour post-dose and were  
822 therefore assumed to be related to the  
823 intravenous dosing procedure rather than to  
824 treatment with the test item.

825 **Genotoxicity** The genotoxic potential of the  
826 test item was investigated in male and  
827 female rats. Blood samples for a  
828 micronucleus assay in peripheral  
829 erythrocytes were collected at the end of the  
830 treatment period on the day of necropsy  
831 (D29). The mean percentage of reticulocytes  
832 (%RET) was increased in the mid and high  
833 dose IV and the IM treated animals (13.6%,

856

## 857 **DISCUSSION**

858 Artesunate has been shown to exhibit  
859 relatively minor effects at high doses on the  
860 central nervous, cardiovascular and  
861 respiratory systems. The dose levels of  
862 artesunate used in the presented studies (up  
863 to 30 mg/kg/d intravenously or  
864 intramuscularly for 4 weeks or a single  
865 intravenous dose of 10, 30 or 60 mg/kg)  
866 were below doses known to cause central  
867 nervous or breathing effects. Following  
868 intravenous administration of artesunate,  
869 doses of 250 mg/kg and above caused  
870 decreased activity, analgesia, muscle  
871 relaxation, and hypnosis in mice.<sup>31</sup>  
872 Intramuscular administration of 150 mg/kg  
873 resulted in neurologic effects and  
874 mortality.<sup>32</sup> In rats, rabbits, guinea pigs,  
875 dogs and monkeys, intravenous doses  
876 reported lowering body temperature, causing  
877 EEG abnormalities, convulsions and

834 7.1%, 5.8% for males, 6.4%, 9.9%, 9.2% for  
835 females, respectively) compared to 0.7% and  
836 1.6% in males and 1.3% and 1.9% in  
837 females of the control and low dose IV  
838 group. The percentage of micronucleated  
839 reticulocytes (%MN-RET) was 0.54%,  
840 3.34%, 2.99% in males and 0.64%, 0.66%,  
841 0.56% in females of the mid and high dose  
842 IV and the IM treated animals ( $p < 0.01$  for  
843 the IV groups,  $p < 0.05$  for the male IM  
844 group), respectively compared to 0.16%,  
845 0.18% (males) and 0.11%, 0.13% (females)  
846 %MN-RET in the control and low dose IV  
847 group, respectively (being in the range of  
848 historical and assay negative control data).  
849 As the average values for micronucleated  
850 reticulocytes exceeded the upper of the  
851 historical ranges of negative/solvent controls  
852 and reached values of the assay internal  
853 positive control, artesunate was classified  
854 positive for the *in vivo* peripheral blood  
855 micronucleus assay.

878 breathing arrest between 160 to  
879 640 mg/kg.<sup>31</sup> A no effect level (NOEL) was  
880 determined for 80 mg/kg intravenously in  
881 monkeys and dogs. In our studies, no effects  
882 on behaviour or cardiovascular effects were  
883 noted for 4-week repeated intravenous or  
884 intramuscular injections. As well, no  
885 breathing abnormalities following a single  
886 intravenous dose of up to 60 mg/kg  
887 artesunate were determined.  
888 After repeated oral doses of artesunate, the  
889 levels of exposure decreased in rats and  
890 rabbits, this was especially evident in the  
891 high doses.<sup>22,33</sup> A decline in exposure in  
892 terms of  $C_{max}$  and AUC was determined as  
893 well in our studies following intravenous  
894 (only in rats) and intramuscular  
895 administration of 30 mg/kg/d for artesunate  
896 and for its main metabolite DHA. Reduced  
897 plasma protein binding (normally between  
898 73-82% in rats) was demonstrated at higher  
899 doses (66% at DHA concentrations  $> 125$

900 ng/mL).<sup>34</sup> Furthermore, the binding capacity  
901 of artesunate was significantly different  
902 between male and female rats in the study  
903 by Li et al., which could explain the  
904 differences observed between the sexes  
905 especially in the 3 mg/kg/d group and the  
906 supra-proportional increases in exposure in  
907 the 30 mg/kg/d IV group in rats.

908 A bioavailability of intramuscular  
909 administered artesunate is reported with  
910 85-105% for artesunate and DHA.<sup>35</sup> In our  
911 studies, bioavailability of artesunate based  
912 on AUC ranged between 26 to 57% in rats  
913 and between 20 and 29% in dogs, although  
914 AUC values are of limited value, as they  
915 were based on single data due to the fast  
916 metabolism of artesunate to DHA.  
917 Bioavailability of DHA was 69% and 89%  
918 in females and males after the first treatment  
919 and only 41% and 47% at the end of the  
920 4-week treatment period. In dogs,  
921 bioavailability of DHA following  
922 intramuscular administration ranged  
923 between 84-114% after a single and repeated  
924 injections, thus being in the range  
925 determined by Li et al.

926 Comparing human and animal exposure and  
927 the resulting effects following intravenous  
928 artesunate treatment, plasma concentration is  
929 not considered to be a good indicator of  
930 tissue exposure (measured by biologic  
931 effects, e.g. reticulocyte reductions) for  
932 artesunate across species.<sup>26</sup> In our studies,  
933 reticulocyte levels were reduced for absolute  
934 counts in dogs only at the end of the 4-week  
935 treatment period, but increased in absolute  
936 and relative counts in rats. Due to the  
937 mechanism of action, (affecting the blood  
938 stages of *plasmodium*, i.e. red blood cells),  
939 thus leading to anaemia (as demonstrated by  
940 our results in both rats and dogs), the  
941 increased reticulocyte levels determined in  
942 rats are indicative of regenerative anaemia  
943 by increased reticulocyte maturation. The  
944 inversed granulocyte to erythroid ratio (GE  
945 ratio <1:1) might be the result of an

946 increased release of granulocytes, as  
947 indicated by increased plasma leukocyte  
948 counts. Increased spleen and liver weights,  
949 especially in rats but also noted in dogs, are  
950 indicative of extramedullary haematopoiesis  
951 to compensate anaemia, complying with  
952 results of other groups, e.g. as seen in a  
953 subchronic oral toxicity study for artesunate  
954 in dogs and a short-term intramuscular study  
955 in mice.<sup>30,36</sup>

956 Effects on clinical chemical parameters in  
957 rats and dogs were mainly characterized by  
958 reduced albumin levels, and increased  
959 globulin and bilirubin levels. The bilirubin is  
960 associated with an increased breakdown of  
961 red blood cells. In addition, an increase in  
962 liver parameters (AST, ALT) was seen in  
963 dogs, which was partly still evident at the  
964 end of the recovery period.

965 The effects described in our studies above  
966 were all of a minor toxic nature and most of  
967 them demonstrating a nearly to complete  
968 recovery, demonstrating a good tolerability  
969 and safety profile for artesunate. Comparing  
970 the intravenous to intramuscular route of  
971 administration, despite differing systemic  
972 exposure, the effects on target organs were  
973 nearly comparable to even more exaggerated  
974 in the intramuscular groups, demonstrating a  
975 good efficacy of this route, despite the local  
976 effects, but only arising after one week of  
977 repeated daily treatment. A good tolerability  
978 is known for intravenous or intramuscular  
979 use of artesunate in humans as well. In open-  
980 label randomised controlled trials in patients  
981 admitted to hospital with severe *falciparum*  
982 malaria in Bangladesh, India, Indonesia, and  
983 Myanmar (performed by the South East Asia  
984 Quinine Artesunate Malaria Trial,  
985 SEAQUAMAT group) and in paediatric  
986 patients admitted to hospital in the sub-  
987 Saharan Africa (AQUAMAT trial), superior  
988 efficacy, and a significantly reduced  
989 mortality were shown over quinine.<sup>37,38</sup> A  
990 better tolerability compared to intramuscular  
991 artemether has been demonstrated in several

992 studies. Following administration of 1008  
993 2.4 mg/kg artesunate at 0, 12 and 24 hours 1009  
994 intravenously continued once daily until oral 1010  
995 tolerance in adults (maximum 7 days) 1011  
996 demonstrated a good tolerability. Beside a 1012  
997 rare type-1 hypersensitivity reaction in about 1013  
998 1 in 3,000 treated patients, no serious 1014  
999 adverse effects were noted. Our present 1015  
1000 studies demonstrated that artesunate, applied 1016  
1001 over a period of four weeks, was safe and 1017  
1002 produced only minor and to a great extent 1018  
1003 reversible effects in rats and dogs. Despite 1019  
1004 varying plasma levels comparing the 1020  
1005 intravenous to the intramuscular route of 1021  
1006 administration, effects on target organs were 1022  
1007 to the same extent, suggesting a comparable

1023

1024

## 1025 REFERENCES

- 1026 <sup>1</sup> World Health Organization WHO guidelines for the 1054  
1027 treatment of malaria. ISBN 92 4 154694 8. 2006. 1055  
1028 WHO/HTM/MAL/2006.1108 1056  
1029 <sup>2</sup> Xie LH, Johnson TO, Weina PJ, Si Y, Haeberle A, 1059  
1030 Upadhyay R, Wong E, and Li Q. Risk Assessment and 1060  
1031 Therapeutic Indices of Artesunate and Artelinate in 1061  
1032 *Plasmodium berghei*-Infected and Uninfected Rats. 1062  
1033 International Journal of Toxicology 2005; 24: 251- 1063  
1034 264. 1064  
1035 <sup>3</sup> Li Q, Xie LH, Johnson TO, Si Y, Haeberle AS, Weina 1065  
1036 PJ. Toxicity evaluation of artesunate and artelinate in 1066  
1037 *Plasmodium berghei*-infected and uninfected rats. 1067  
1038 Transactions of the Royal Society of Tropical 1068  
1039 Medicine and Hygiene. 2007; 101 (2): 104-112. 1069  
1040 <sup>4</sup> Genovese RF, Newman DB, Brewer TG. Behavioral 1070  
1041 and neural toxicity of the artemisinin antimalarial, 1071  
1042 arteether, but not artesunate and artelinate, in rats. 1072  
1043 Pharmacology, Biochemistry and Behavior 2000; 67: 1073  
1044 37-44. 1074  
1045 <sup>5</sup> Li Q-G, Brewer TG, Peggins JO. Anorectic toxicity of 1075  
1046 dihydroartemisinin, artemether, and arteether in rats 1076  
1047 following multiple intramuscular doses. International 1077  
1048 Journal of Toxicology. 1998; 17: 663-676. 1078  
1049 <sup>6</sup> China Cooperative Research Group (CCRG). Studies on 1079  
1050 the toxicity of Quinghaosu and its derivatives. Journal 1080  
1051 of Traditional Chinese Medicine. 1982; 2(1): 31-38. 1081  
1052 <sup>7</sup> Miller RS, Gettayacamin M, Hansukjariya P, Petras JM, 1082  
1053 Ittiweerakul M, Teja-Isavadharm P, Weina PJ, 1083

exposure, and potential effectivity, of  
artesunate for both routes, and despite some  
local effects during extended (beyond one  
week) duration of treatment for the  
intramuscular route, a comparable safety  
profile.

**Acknowledgments** The experimental  
studies were funded by Guilin  
Pharmaceutical Co., Ltd.

**Declaration of interests** Y Xiong and Q  
Huang are employed at Guilin  
Pharmaceutical Co, Ltd. All other authors  
declare that they have no conflicts of  
interest.

Blanchard TW. Intravenous artesunate and artelinate  
produce different toxicity profiles with 7-day  
administration in rhesus monkeys. American Journal  
of Tropical Medicine and Hygiene 2003 Sept; 69 (S3):  
492.

<sup>8</sup> Olumide SA, Raji Y. Long-Term Administration of  
Artesunate Induces Reproductive Toxicity in Male  
Rats. J Reprod Infertil. 2011; 12(4):249-260.

<sup>9</sup> Longo M, Zanoncelli S, Della Torre P, Rosa F, Giusti  
A, Colombo P, Brughera M, Mazué G, Olliaro P.  
Investigations of the effects of the antimalarial drug  
dihydroartemisinin (DHA) using the Frog Embryo  
Teratogenesis Assay-Xenopus (FETAX).  
Reproductive toxicology (Elmsford, N.Y.) 2008 Aug;  
25(4): 433-441.

<sup>10</sup> Longo M, Zanoncelli S, Torre PD, Riflettuto M, Cocco  
F, Pesenti M, Giusti A, Colombo P, Brughera M,  
Mazué G, Navaratman V, Gomes M, Olliaro P. *In vivo*  
and *in vitro* investigations of the effects of the  
antimalarial drug dihydroartemisinin (DHA) on rat  
embryos. Reproductive toxicology 2006a Nov; 22(4):  
797-810.

<sup>11</sup> Longo M, Zanoncelli S, Manera D, Brughera M,  
Colombo P, Lansen J, Mazué G, Gomes M, Taylor  
WRJ, Olliaro P. Effects of the antimalarial drug  
dihydroartemisinin (DHA) on rat embryos *in vitro*.  
Reproductive toxicology 2006b Jan; 21(1): 83-93.

<sup>12</sup> Posobiec LM, Clark RL, Bushdid PB, Laffan SB,  
Wang K-F, White TKE. Dihydroartemisinin (DHA)  
Treatment Causes an Arrest of Cell Division and

- 1084 Apoptosis in Rat Embryonic Erythroblasts in Whole 1135  
1085 Embryo Culture. Birth Defects Research (Part B) 1136  
1086 2013; 98: 445-458. 1137
- 1087 <sup>13</sup> Clark RL, Lerman SA, Cox EM, Gristwood WE, White 1138  
1088 TEK. Developmental Toxicity of Artesunate in the 1139  
1089 Rat: Comparison to Other Artemisinins, Comparison 1140  
1090 of Embryotoxicity and Kinetics by Oral and 1141  
1091 Intravenous Routes, and Relationship to Maternal 1142  
1092 Reticulocyte Count. Birth Defects Research (Part B) 1143  
1093 2008; 83: 397-406. 1144
- 1094 <sup>14</sup> Li Q, Si Y, Xie L, Zhang J, Weina P. Severe 1145  
1095 Embryoletality of Artesunate Related to 1146  
1096 Pharmacokinetics Following Intravenous and 1147  
1097 Intramuscular Doses in Pregnant Rats. Birth Defects 1148  
1098 Research (Part B) 2009; 86: 385-393. 1149
- 1099 <sup>15</sup> Li Q, Si Y, Smith KS, Zeng Q, Weina PJ. 1150  
1100 Embryotoxicity of Artesunate in Animal Species 1151  
1101 Related to Drug Tissue Distribution and Toxicokinetic 1152  
1102 Profiles. Birth Defects Research (Part B) 2008; 83: 1153  
1103 435-445. 1154
- 1104 <sup>16</sup> Si Y, Zeng Q, Zhang J, Johnson TO, Xie LH, Weina 1155  
1105 PJ, Milhous WK, Li Q. Evaluation of the embryonic 1156  
1106 toxicity of artesunate in rats. Am J Trop Med 2004; 71 1157  
1107 (881):260. 1158
- 1108 <sup>17</sup> White TEK, Bushdid PB, Ritter S, Laffan SB, Clark 1159  
1109 RL. Artesunate-induced depletion of embryonic 1160  
1110 erythroblasts precedes embryoletality and 1161  
1111 teratogenicity *in vivo*. Birth defects research. Part B, 1162  
1112 Developmental and reproductive toxicology 2006 Oct; 1163  
1113 77: 413-429. 1164
- 1114 <sup>18</sup> Clark RL, Brannen KC, Sanders JE, Hoberman AM. 1165  
1115 Artesunate and Artelinic Acid: Association of 1166  
1116 Embryotoxicity, Reticulocytopenia, and Delayed 1167  
1117 Stimulation of Hematopoiesis in Pregnant Rats. Birth 1168  
1118 Defects Research (Part B) 2011; 92: 52-68. 1169
- 1119 <sup>19</sup> Boareto AC, Müller JC, de Araujo SL, Lourenço AC, 1170  
1120 Lourenço ELB, Gomes C, Minatovicz B, Lombardi N, 1171  
1121 Paumgartten FR, Dalsenter PR. Study on the 1172  
1122 developmental toxicity of combined artesunate and 1173  
1123 mefloquine antimalarial drugs on rats. Reproductive 1174  
1124 toxicology (Elmsford, N.Y.) Dec 2012; 34.4: 658-664. 1175
- 1125 <sup>20</sup> Boareto AC, Müller JC, Lourenço ELB, Lombardi N, 1176  
1126 Lourenço AC, Rabbitto I, de Moraes RN, Rios FS, 1177  
1127 Dalsenter P. Effects of the combined artesunate and 1178  
1128 mefloquine antimalarial drugs on rat embryos. Human 1179  
1129 & experimental toxicology Sep 2013; 32.9: 930-941. 1180
- 1130 <sup>21</sup> White TEK, Clark RL. Sensitive periods for 1181  
1131 developmental toxicity of orally administered 1182  
1132 artesunate in the rat. Birth defects research. Part B, 1183  
1133 Developmental and reproductive toxicology 2008 1184  
1134 Aug; 83 (4): 407-417. 1184
- <sup>22</sup> Clark RL, White TE, S AC, Gaunt I, Winstanley P, 1185  
Ward SA. Developmental toxicity of artesunate and an 1186  
artesunate combination in the rat and rabbit. Birth 1187  
defects research Part B, Developmental and 1188  
reproductive toxicology. 2004; 71(6): 380-394. 1189
- <sup>23</sup> Chung M-K, Yu W-J, Lee J-S and Lee J-H. 1190  
Embryotoxicity and Toxicokinetics of the 1191  
Antimalarial Artesunate in Rats. Toxicol. Res. 2013; 1192  
29(1): 27-34. 1193
- <sup>24</sup> Nwaehujor CO, Asuzu OV, Nwibo DD, Nwobi OC, 1194  
Ezeigbo II. Effects of Artesunate on some biochemical 1195  
parameters in pregnant albino Wistar rats challenged 1196  
with lethal strain Plasmodium berghei NK65: 1197  
Appreciating the activities of artemisinin drugs on key 1198  
pregnancy hormone balance. Experimental and 1199  
Toxicologic Pathology 2017; 69: 408-411. 1200
- <sup>25</sup> Rath B, Jena J, Samal S and Rath B. Reproductive 1201  
profile of artemisinins in albino rats. Indian Journal of 1202  
Pharmacology 2010 May; 42(3): 192-193 [review]. 1203
- <sup>26</sup> Clark RL, Arima A, Makori N, Nakata Y, Bernard F, et 1204  
al. Artesunate: developmental toxicity and 1205  
toxicokinetics in monkeys. Birth Defects Res B Dev 1206  
Reprod Toxicol 2008; 83: 418-434. 1207
- <sup>27</sup> Desai KR, Rajput DK, Patel PB, Highland HN. 1208  
Ameliorative Effects of Curcumin on Artesunate- 1209  
Induced Subchronic Toxicity in Testis of Swiss 1210  
Albino Male Mice. Dose-Response: an International 1211  
Journal. 2015; 1-9. 1212
- <sup>28</sup> Bigoniya P, Sahu T, Tiwar V. Hematological and 1213  
biochemical effects of sub-chronic artesunate 1214  
exposure in rats. Toxicology Reports 2015; 2: 280- 1215  
288. 1216
- <sup>29</sup> Eighbibhalu UG, Taiwo EOA, Douglass IA and 1217  
Abimbola EA. Effect of selected anti-malarial drugs 1218  
on the blood chemistry and brain serotonin levels in 1219  
male rabbits. Pak J Pharm Sci 2013; 26(1): 125-129. 1220
- <sup>30</sup> Yin J-Y, Wang H-M, Wang Q-J, Dong Y-S, Han G, 1221  
Guan Y-B, Zhao K-Y, Qu W-S; Yuan Y, Gao X-X, 1222  
Jing S-F, Ding R-G. Subchronic Toxicological Study 1223  
of two artemisinin derivatives in dogs. PLOS One 1224  
April 2014 9(4) e94034. 1225  
doi:10.1371/journal.pone.0094034. 1226
- <sup>31</sup> Zhao Y. Studies on systemic pharmacological effects 1227  
of artesunate. The Journal of tropical medicine and 1228  
hygiene. 1985; 88(6): 391-396. 1229
- <sup>32</sup> Nontprasert A, Pukrittayakamee S, Nosten-Bertrand M, 1230  
Vanijanonta S, White NJ. Studies of the neurotoxicity 1231  
of oral artemisinin derivatives in mice. The American 1232  
journal of tropical medicine and hygiene. 2000; 62: 1233  
409-412. 1234

- 1185 <sup>33</sup> Xing J, Bai KH, Liu T, Wang RL, Zhang LF, Zhang SQ. The multiple-dosing pharmacokinetics of 1221  
1186 artemether, artesunate, and their metabolite  
1187 dihydroartemisinin in rats. *Xenobiotica* 2011; 41(3):  
1188 252-258.  
1189
- 1190 <sup>34</sup> Li Q, Xie LH, Haerberle A, Zhang J, Weina P. The  
1191 evaluation of radiolabeled artesunate on tissue  
1192 distribution in rats and protein binding in humans. *Am*  
1193 *J Trop Med Hyg* 2006; 75(5): 817-826.
- 1194 <sup>35</sup> Li Q-G, Peggins JO, Fleckenstein LL, Masonic K,  
1195 Heiffer MH, Brewer TG. The pharmacokinetics and  
1196 bioavailability of dihydroartemisinin, arteether,  
1197 artemether, artesunic acid and artelinic acid in rats. *J.*  
1198 *Pharm. Pharmacol.* 1998; 50: 173—182.
- 1199 <sup>36</sup> Lin P-Y, Feng Z-M, Pan J-Q, Zhang D, Xiao L-Y.  
1200 Effects of artesunate on immune function in mice.  
1201 *Acta Pharmacologica Sinica* 1995; 16(5): 441-444.
- 1202 <sup>37</sup> Dondorp A, Nosten F, Stepniewska K, Day N, White  
1203 N, South East Asian Quinine Artesunate Malaria Trial  
1204 (SEAQUAMAT) group. *Lancet* 2005;366:717-25.
- 1205 <sup>38</sup> Dondorp AM, Fanello CI, Hendriksen IC, Gomes E,  
1206 Seni A, Chhaganlal KD, Bojang K, Olaosebikan R,  
1207 Anunobi N, Maitland K, Kivaya E, Agbenyega T,  
1208 Nguah SB, Evans J, Gesase S, Kahabuka C, Mtove G,  
1209 Nadjm B, Deen J, Mwanga-Amumpaire J, Nansumba  
1210 M, Karema C, Umulisa N, Uwimana A, Mokuolu OA,  
1211 Adedoyin OT, Johnson WB, Tshefu AK, Anyamboko  
1212 MA, Sakulthaew, T, Ngum WP, Silamut K,  
1213 Stepniewska K, Woodrow CJ, Bethell D, Wills B,  
1214 Oneko M, Peto TE, von Seidlein L, Day NP, White  
1215 NJ. Artesunate versus quinine in the treatment of  
1216 severe falciparum malaria in African children  
1217 (AQUAMAT): an open-label, randomized trial.  
1218 *Lancet* 2010;376:1647-57.
- 1219

## 1222 **S - Supporting information**

1223

1224 **Table 3: Study Procedures**

| Study                      | Study Day | Parameter                                                                     |
|----------------------------|-----------|-------------------------------------------------------------------------------|
| Repeated dose toxicity rat | -2        | Ophthalmology                                                                 |
|                            | 1 - 28    | Daily intravenous and intramuscular treatment                                 |
|                            | 1         | Modified IRWIN test incl. body temperature, TK sampling                       |
|                            | 2         | Modified IRWIN test incl. body temperature, TK sampling                       |
|                            | 27        | Modified IRWIN test incl. body temperature, ophthalmology                     |
|                            | 28        | Modified IRWIN test incl. body temperature, TK sampling, urine                |
|                            | 29        | Clinical pathology, micronucleus assay, organ weights, macroscopic evaluation |
|                            | 56        | Urine                                                                         |
|                            | 57        | Clinical pathology, organ weights, macroscopic evaluation                     |



---

| <b>Study</b>                  | <b>Study Day</b> | <b>Parameter</b>                                                     |
|-------------------------------|------------------|----------------------------------------------------------------------|
| Repeated dose<br>toxicity dog | -8               | Ophthalmology, clinical pathology, ECG incl. body temperature        |
|                               | -6               | Urine                                                                |
|                               | -3               | Clinical pathology, body temperature, feces                          |
|                               | 1 - 28           | Daily intravenous and intramuscular treatment                        |
|                               | 1                | TK sampling, body temperature                                        |
|                               | 2                | TK sampling, body temperature                                        |
|                               | 26               | Urine                                                                |
|                               | 27               | TK sampling, ECG incl. body temperature                              |
|                               | 28               | Ophthalmology, clinical pathology, body temperature, feces           |
|                               | 29               | Organ weights, macroscopic evaluation                                |
|                               | 55               | Urine                                                                |
|                               | 56               | Ophthalmology, clinical pathology, ECG incl. body temperature, feces |
|                               | 57               | Organ weights, macroscopic evaluation                                |

---

1225

1226 **Table 4: Study Parameters**

| Species | Endpoint                          | Parameter                                                                                                                                                                                                                                                                                                                                                                                                                                                                                                                                                                                                                                                                                                                                                                                                                      | Unit |
|---------|-----------------------------------|--------------------------------------------------------------------------------------------------------------------------------------------------------------------------------------------------------------------------------------------------------------------------------------------------------------------------------------------------------------------------------------------------------------------------------------------------------------------------------------------------------------------------------------------------------------------------------------------------------------------------------------------------------------------------------------------------------------------------------------------------------------------------------------------------------------------------------|------|
| Dog     | Electrocardiogram (ECG)           | PR interval                                                                                                                                                                                                                                                                                                                                                                                                                                                                                                                                                                                                                                                                                                                                                                                                                    | ms   |
|         |                                   | RR intervals                                                                                                                                                                                                                                                                                                                                                                                                                                                                                                                                                                                                                                                                                                                                                                                                                   | ms   |
|         |                                   | QRS waves                                                                                                                                                                                                                                                                                                                                                                                                                                                                                                                                                                                                                                                                                                                                                                                                                      | ms   |
|         |                                   | QT interval                                                                                                                                                                                                                                                                                                                                                                                                                                                                                                                                                                                                                                                                                                                                                                                                                    | ms   |
|         |                                   | Corrected QT interval (QTcv)                                                                                                                                                                                                                                                                                                                                                                                                                                                                                                                                                                                                                                                                                                                                                                                                   | ms   |
|         |                                   | HR                                                                                                                                                                                                                                                                                                                                                                                                                                                                                                                                                                                                                                                                                                                                                                                                                             | bpm  |
| Dog/rat | Ophthalmology                     | Eyelid, eyeball, conjunctiva, sclera, cornea, anterior chamber, iris, pupil, crystal, vitreous body and fundus                                                                                                                                                                                                                                                                                                                                                                                                                                                                                                                                                                                                                                                                                                                 |      |
|         | Organ weights                     | Adrenal, brain, epididymidis, heart, kidneys, liver, ovaries, oviduct, uterus, spleen, testes, thymus, thyroid and parathyroid                                                                                                                                                                                                                                                                                                                                                                                                                                                                                                                                                                                                                                                                                                 |      |
|         | Necropsy                          | Body and musculoskeletal system, body surface and natural orifices; cranial cavity and the outer surface of the brain, thoracic cavity, abdominal cavity, pelvic cavity and visceral organ, all gross lesions (location, color, shape, or size)                                                                                                                                                                                                                                                                                                                                                                                                                                                                                                                                                                                |      |
|         | Histopathology (collected organs) | Administration site, adrenals, aorta, bone (femur), bone marrow (sternum), brain (cerebrum), brain (cerebellum), brain (medulla), cecum, colon, duodenum, epididymides, esophagus, eyes, gall bladder (dogs), heart, ileum, jejunum, kidneys <sup>a</sup> , liver, lungs (with main-stem bronchi), lymph node (mesenteric), lymph node (submandibular), mammary gland (dog female only, rat male and female), nerve (optic), nerve (sciatic, dog only), uterus, ovaries, oviduct, pancreas, parathyroid, Peyer's patch, pituitary, prostate, rectum, salivary glands (submandibular), skeletal muscle (biceps femoris), skin (abdominal), spinal cord (cervical), spinal cord (mid-thoracic), spinal cord (lumbar), spleen, stomach, testes, thymus, thyroid, tissues with any gross lesions, trachea, urinary bladder, vagina |      |
| Rat     | Whole-body plethysmography        | TV (tidal volume)                                                                                                                                                                                                                                                                                                                                                                                                                                                                                                                                                                                                                                                                                                                                                                                                              | mL   |
|         |                                   | MV (minute volume)                                                                                                                                                                                                                                                                                                                                                                                                                                                                                                                                                                                                                                                                                                                                                                                                             | mL   |
|         |                                   | RR (respiratory rate)                                                                                                                                                                                                                                                                                                                                                                                                                                                                                                                                                                                                                                                                                                                                                                                                          | bpm  |

Abbreviations: ms = milliseconds; bpm = beats per minute

<sup>a</sup>. All dog renal tissue slice used for immunohistochemical detection.

1227 **Table 5: Study Parameters (Clinical Pathology)**

| Endpoint                    | Parameter                                        | Unit                | Parameter                         | Unit                |
|-----------------------------|--------------------------------------------------|---------------------|-----------------------------------|---------------------|
| Haematology and Coagulation | Red Blood Cell Count (RBC)                       | 10 <sup>12</sup> /L | Platelet Distribution Width (PDW) | fL                  |
|                             | Hemoglobin (HGB)                                 | g/dL                | Platelets Crit (PCT)              | %                   |
| Coagulation                 | Hematocrit (HCT)                                 | %                   | White Blood Cell Count (WBC)      | 10 <sup>9</sup> /L  |
|                             | Mean Corpuscular Volume (MCV)                    | fL                  | Neutrophils (Absolute) (NEUT)     | 10 <sup>3</sup> /μL |
|                             | Mean Corpuscular Hemoglobin (MCH)                | pg                  | Lymphocytes (Absolute) (LWMPH)    | 10 <sup>3</sup> /μL |
|                             | Mean Corpuscular Hemoglobin Concentration (MCHC) | g/dL                | Monocytes (Absolute) (MONO)       | 10 <sup>3</sup> /μL |
|                             | Reticulocyte Absolute (#RET)                     | 10 <sup>9</sup> /L  | Eosinophils (Absolute) (EOS)      | 10 <sup>3</sup> /μL |
|                             | Reticulocyte Percent (RET%)                      | %                   | Basophils (Absolute) (BASO)       | 10 <sup>3</sup> /μL |
|                             | Red cell Distribution Width (RDW-CV)             | %                   | Neutrophils Percent (NEUT%)       | %                   |

| Endpoint           | Parameter                                      | Unit               | Parameter                       | Unit                         |
|--------------------|------------------------------------------------|--------------------|---------------------------------|------------------------------|
|                    | Platelet Count (PLT&O)                         | 10 <sup>9</sup> /L | Lymphocytes Percent (LYMPH%)    | %                            |
|                    | Mean Platelet Volume (MPV)                     | fL                 | Monocytes Percent (MONO%)       | %                            |
|                    | Nucleated Red Blood Cells (Relative) (NRBC%)   | %                  | Basophils Percent (BASO%)       | %                            |
|                    | Nucleated Red Blood Cells (Absolute) (#NRBC)   | 10/ $\mu$ L        | Eosinophils Percent (EOS%)      | %                            |
|                    | Prothrombin Time (PT)                          | sec                | Thrombin Time (TT)              | sec                          |
|                    | Activated Partial Thromboplastin Time (APTT)   | sec                | Fibrinogen (Fbgc)               | g/L                          |
| Clinical chemistry | Alanine Aminotransferase (ALT)                 | U/L                | Total Protein (TP)              | g/L                          |
|                    | Aspartate Aminotransferase (AST)               | U/L                | Albumin (ALB)                   | g/L                          |
|                    | Alkaline Phosphatase (ALP)                     | U/L                | Globulin (GLO)                  | g/L                          |
|                    | Creatine Kinase (CK)                           | U/L                | Albumin/Globulin Ratio (A/G)    | N/A                          |
|                    | Gamma glutamyl transpeptidase (GGT) (dog only) | U/L                | Amylase (AMY)                   | U/L                          |
|                    | Total cholesterol (CHOL)                       | mmol/L             | Lipase (LIP)                    | U/L                          |
|                    | Triglyceride (TG)                              | mmol/L             | Total Bile Acids (TBA)          | $\mu$ mol/L                  |
|                    | Total Bilirubin (T-BIL)                        | $\mu$ mol/L        | Lactic Dehydrogenase (LDH)      | U/L                          |
|                    | Bilirubin, Direct (D-BIL)                      | $\mu$ mol/L        | Potassium (K)                   | mmol/L                       |
|                    | Glucose (GLU)                                  | mmol/L             | Chloride (Cl)                   | mmol/L                       |
|                    | Blood urea Nitrogen (BUN)                      | mmol/L             | Calcium (Ca)                    | mmol/L                       |
|                    | Creatinine (CREA)                              | $\mu$ mol/L        | Inorganic Phosphate (P)         | mmol/L                       |
|                    | Sodium (Na)                                    | mmol/L             |                                 |                              |
| Urinalysis         | Specific gravity                               | Glucose            | Urobilinogen                    | Color (visual)               |
|                    | Protein                                        | Bilirubin          | White blood cells               | Urine pH                     |
|                    | Ketones                                        | Nitrite            | Vitamin C                       | Urine sediment (microscopic) |
|                    | Occult blood                                   | Clarity (visual)   | Urine volume (approx. 16 hours) | mL                           |

Abbreviations: sec = seconds; ms = milliseconds; g = gram; L = liter; dL = deciliter;  $\mu$ L = microliter; fL = femtoliter; pg = picogram; % = percent; U = unit; N/A = not applicable, mmol = millimole;  $\mu$ mol = micromole.

1229

1230 **Table 6: Study Parameters (Irwin Screen) in Rats**

| Parameter                                                | Score | Description                                                                                                                                                                                 |
|----------------------------------------------------------|-------|---------------------------------------------------------------------------------------------------------------------------------------------------------------------------------------------|
| <b>A. Observations in Removal from Cage and Handling</b> |       |                                                                                                                                                                                             |
| Ease of removal                                          | 1-3   | 1 = normal, 2 = easier, 3 = difficult                                                                                                                                                       |
| Handling reactivity                                      | 1-3   | 1 = normal (with squeaking sound or moderate resistance),<br>2 = less (staying quietly in the hands or slightly resistance),<br>3 = greater (struggling intensely or twisting in the hands) |
| Body tone                                                | 1-3   | 1 = normal, 2 = decreased, 3 = increased                                                                                                                                                    |
| Palpebral closure                                        |       | 1 = normal opening of eyelids,<br>2 = partially closed eyes, 3 = eyelids shut                                                                                                               |
| Eye observations                                         | 1-6   | 1 = normal,<br>2 = chromodacryorrhea or red tears,<br>3 = exophthalmos or protrusion of eyeball,<br>4 = nystagmus or unusual, repetitive eye movement,<br>5 = opacity, 6 = lacrimation      |

| Parameter                                                       | Score        | Description                                                                                                                                                                                                                                                                                                                                                                                                                                                                            |
|-----------------------------------------------------------------|--------------|----------------------------------------------------------------------------------------------------------------------------------------------------------------------------------------------------------------------------------------------------------------------------------------------------------------------------------------------------------------------------------------------------------------------------------------------------------------------------------------|
| Pupil size                                                      | <0.5~<br>3.5 |                                                                                                                                                                                                                                                                                                                                                                                                                                                                                        |
| Pupil response                                                  | 1-3          | 1 = normal, 2 = reduced, 3 = no response                                                                                                                                                                                                                                                                                                                                                                                                                                               |
| Palpebral reflex                                                | 1-4          | 1 = normal, 2 = reduced, 3 = no response,<br>4 = exaggerated                                                                                                                                                                                                                                                                                                                                                                                                                           |
| Salivation                                                      | 1-3          | 1 = none, 2 = light, 3 = severe                                                                                                                                                                                                                                                                                                                                                                                                                                                        |
| Piloerection                                                    | 1-2          | 1 = not present<br>2 = present (coat does not lie down after stroking)                                                                                                                                                                                                                                                                                                                                                                                                                 |
| <b>B. Observations in open field</b>                            |              |                                                                                                                                                                                                                                                                                                                                                                                                                                                                                        |
| Involuntary motor movements                                     | 1-2          | 1 = no present<br>2 = present (a = fasciculation, b = tremors, c = clonic (test discontinued), d = tonic (test discontinued), e = clonic/tonic (test discontinued))                                                                                                                                                                                                                                                                                                                    |
| Arousal (the level of alertness)                                | 1-3          | 1 = normal head or body movement,<br>2 = decreased head or body movements,<br>3 = increased head or body movement                                                                                                                                                                                                                                                                                                                                                                      |
| Ambulation activity                                             | 1-4          | 1 = normal, 2 = slight impairment,<br>3 = severe impairment                                                                                                                                                                                                                                                                                                                                                                                                                            |
| Gait                                                            | 1-2          | 1 = normal,<br>2 = abnormal (a = ataxia, b = forelimbs drag, are extended or unable to support weight, c = hindlimbs drag, are extended or unable to support weight, d = walks on tiptoes, e = hunched or crouched body position, f = rat is ambulatory, body is flat, and legs are unable to support its weight, g = rat is ambulatory, body is flat to the ground, and legs are unable to support its weight, h = recumbency (test discontinued), i = unable to asses for no moving) |
| Excessive behavior                                              | 1-2          | 1 = not present,<br>2 = present (a = licking/biting, b = grooming, c = scratching, d = chewing, e = head-bobbing, f = circling, g = sniffing, h = other)                                                                                                                                                                                                                                                                                                                               |
| Bizarre behavior (such as straub tail, repulsion, and writhing) | 1-2          | 1 = not present, 2 = present                                                                                                                                                                                                                                                                                                                                                                                                                                                           |
| Respiration                                                     | 1-2          | 1 = normal<br>2 = abnormal (a = slowed, b = rapid, c = dyspnea, d = noisy)                                                                                                                                                                                                                                                                                                                                                                                                             |
| <b>C. Stimulus Reactivity</b>                                   |              |                                                                                                                                                                                                                                                                                                                                                                                                                                                                                        |
| Startle response                                                | 1-4          | 1 = normal reactivity (short jerk),<br>2 = hypo-reactivity (weak reaction),<br>3 = absent (no reaction),<br>4 = hyperreactivity (jumping with all paws off the ground)                                                                                                                                                                                                                                                                                                                 |
| Extensor thrust                                                 | 1-4          | 1 = normal response, 2 = reduced response,<br>3 = no response, 4 = exaggerated response                                                                                                                                                                                                                                                                                                                                                                                                |
| <b>D. Manipulations Test</b>                                    |              |                                                                                                                                                                                                                                                                                                                                                                                                                                                                                        |
| Air righting reflex                                             | 1-4          | 1 = normal, lands on all four feet,<br>2 = lands on all four feet, slightly uncoordinated,<br>3 = lands on side, 4 = lands on back                                                                                                                                                                                                                                                                                                                                                     |
| <b>E. Physiological parameters</b>                              |              |                                                                                                                                                                                                                                                                                                                                                                                                                                                                                        |
| Loose/watery feces                                              | 1-2          | 1 = not present, 2 = present                                                                                                                                                                                                                                                                                                                                                                                                                                                           |

1231

1232 **Table 7: Statistical Methods**

| Species                 | Endpoint                                                                                                                                                                                                                          | Statistical methods                                                                                                                                                                                                                                                                                                                                                                                                                                                                                                                                                                                                                                                                                                                                                                                                                                                                                                                                                                                                                                                                                                                                                                                                                                                                                                                         |
|-------------------------|-----------------------------------------------------------------------------------------------------------------------------------------------------------------------------------------------------------------------------------|---------------------------------------------------------------------------------------------------------------------------------------------------------------------------------------------------------------------------------------------------------------------------------------------------------------------------------------------------------------------------------------------------------------------------------------------------------------------------------------------------------------------------------------------------------------------------------------------------------------------------------------------------------------------------------------------------------------------------------------------------------------------------------------------------------------------------------------------------------------------------------------------------------------------------------------------------------------------------------------------------------------------------------------------------------------------------------------------------------------------------------------------------------------------------------------------------------------------------------------------------------------------------------------------------------------------------------------------|
| Dog/rat                 | body weights, body weight gains, food consumption (during dosing period), body temperature, ECG parameters, haematology, coagulation, clinical chemistry, organ weights, ratios of organ-to-body weight and organ-to-brain weight | <p>Data within groups were evaluated for homogeneity of variance by Levene's test. For data whose variances are homogeneous (<math>p &gt; 0.05</math>), a one-way analysis of variance (ANOVA) was performed on the data; for non-homogeneous data (<math>p \leq 0.05</math>), a logarithmic transformation was automatically applied to obtain log data, and a Levene's test was applied to the log data again. For log data whose variances were homogeneous (<math>p &gt; 0.05</math>), a one-way analysis of variance (ANOVA) was performed on the log data; for non-homogeneous log data (<math>p \leq 0.05</math>), a rank transformation was applied on the log data to obtain rank data before Kruskal-Wallis test being performed.</p> <p>Differences between groups were further tested by Dunnett t test for pairwise comparisons (at the 0.05 and 0.01 levels) only if the ANOVA was significant (<math>p \leq 0.05</math>); otherwise no further analyses was performed.</p> <p>If significant results were obtained in the Kruskal-Wallis test (<math>p \leq 0.05</math>), Dunnett t test on rank data were used for pairwise comparisons between groups (at the 0.05 and 0.01 levels); If no significant results were obtained in the Kruskal-Wallis test (<math>p &gt; 0.05</math>), no further analysis was performed.</p> |
| Dog/rat                 | Binary data like lacrimation, paralysis, convulsions, splayed hindlegs, urination, defecation, death                                                                                                                              | SPSS statistics 21. Pearson's Chi-square was used for analysis of binary data; ranked data were analyzed by Kruskal-Wallis test. When there was a statistical significance ( $p \leq 0.05$ ), Dunnett's t test was conducted (at the level of 0.05 and 0.01) after rank transformation of the data. When there was no statistical significance ( $p > 0.05$ ), no additional statistical analysis was made.                                                                                                                                                                                                                                                                                                                                                                                                                                                                                                                                                                                                                                                                                                                                                                                                                                                                                                                                 |
| Rat (respiratory study) | Respiratory rate RR, tidal volume TV, and minute volume MV                                                                                                                                                                        | <p>SPSS statistics 21, groups 2-4 were compared with group 1, or the data at each time point after dosing with the baseline value:</p> <ol style="list-style-type: none"> <li>1) Data within groups were evaluated for homogeneity of variance by Levene's test. When Levene's test indicated homogeneous variances (<math>p &gt; 0.05</math>), comparison between test article treated and control groups were made using a one-way analysis of variance (ANOVA); when variances are significant (<math>p \leq 0.05</math>), Dunnett's T3 test were applied (at the 0.05 and 0.01 levels).</li> <li>2) When analysis of variance was significant (<math>p \leq 0.05</math>), a comparison of treated groups to control group by Dunnett's test for multiple comparisons was performed (at the 0.05 and 0.01 levels); when analysis of variance was not significant (<math>p &gt; 0.05</math>), statistical analysis was completed.</li> </ol>                                                                                                                                                                                                                                                                                                                                                                                              |

Abbreviations: ms = milliseconds; bpm = beats per minute.

1233  
1234  
1235

1236 **Table 8: Haematology and Coagulation Data Rats (D29), Means ± SD**

| Parameter                  | Sex | Control |       | 3 mg/kg/d IV |        | 10 mg/kg/d IM |         | 30 mg/kg/d IV |         | 30 mg/kg/d IM |         |
|----------------------------|-----|---------|-------|--------------|--------|---------------|---------|---------------|---------|---------------|---------|
|                            |     | Mean    | SD    | Mean         | SD     | Mean          | SD      | Mean          | SD      | Mean          | SD      |
| WBC (10 <sup>9</sup> /L)   | M   | 6.57    | 1.09  | 6.44         | 1.40   | 10.05         | 1.70**  | 14.46         | 3.12**  | 14.67         | 3.60**  |
|                            | F   | 4.53    | 1.83  | 4.42         | 1.60   | 6.68          | 2.38    | 9.28          | 2.45**  | 11.79         | 3.71**  |
| NEUT (10 <sup>9</sup> /L)  | M   | 0.79    | 0.16  | 0.78         | 0.27   | 1.76          | 0.51**  | 3.34          | 0.52**  | 4.06          | 1.73**  |
|                            | F   | 0.71    | 0.61  | 0.50         | 0.23   | 1.49          | 0.89**  | 2.31          | 0.65**  | 2.91          | 1.21**  |
| LYMPH (10 <sup>9</sup> /L) | M   | 5.39    | 0.90  | 5.32         | 1.20   | 7.32          | 1.41*   | 8.45          | 2.42**  | 7.44          | 2.34**  |
|                            | F   | 3.57    | 1.36  | 3.66         | 1.33   | 4.65          | 1.84    | 4.91          | 1.23    | 6.90          | 2.55**  |
| MONO (10 <sup>9</sup> /L)  | M   | 0.36    | 0.12  | 0.31         | 0.07   | 0.92          | 0.30**  | 2.49          | 0.88**  | 2.98          | 0.94**  |
|                            | F   | 0.22    | 0.10  | 0.23         | 0.10   | 0.50          | 0.25*   | 1.94          | 0.87**  | 1.85          | 0.80**  |
| BASO (10 <sup>9</sup> /L)  | M   | 0.01    | 0.01  | 0.01         | 0.00   | 0.03          | 0.01**  | 0.12          | 0.09**  | 0.16          | 0.07**  |
|                            | F   | 0.01    | 0.01  | 0.01         | 0.01   | 0.01          | 0.01    | 0.08          | 0.06**  | 0.09          | 0.08**  |
| RBC (10 <sup>12</sup> /L)  | M   | 8.00    | 0.26  | 7.94         | 0.56   | 5.88          | 0.78**  | 4.15          | 0.43**  | 3.87          | 0.50**  |
|                            | F   | 7.01    | 0.32  | 7.28         | 0.33   | 5.55          | 0.70**  | 3.64          | 0.53**  | 3.75          | 0.86**  |
| HGB (g/dL)                 | M   | 14.95   | 0.78  | 14.07        | 0.92   | 10.31         | 0.90**  | 7.69          | 0.64**  | 7.37          | 0.95**  |
|                            | F   | 13.74   | 0.60  | 13.19        | 0.51   | 9.77          | 1.00**  | 6.74          | 0.98**  | 6.91          | 1.71**  |
| HCT (%)                    | M   | 43.42   | 2.01  | 41.45        | 2.72   | 33.04         | 2.65**  | 26.86         | 1.97**  | 24.45         | 2.67**  |
|                            | F   | 40.38   | 2.47  | 39.82        | 1.38   | 31.14         | 2.84**  | 22.71         | 2.95**  | 22.71         | 5.42**  |
| MCV (fL)                   | M   | 54.27   | 1.86  | 52.20        | 1.05*  | 56.62         | 3.89    | 65.05         | 3.38**  | 63.36         | 2.43**  |
|                            | F   | 57.57   | 2.00  | 54.74        | 2.06   | 56.46         | 3.30    | 62.62         | 3.09**  | 60.68         | 2.82    |
| MCH (pg)                   | M   | 18.70   | 0.78  | 17.73        | 0.40** | 17.65         | 1.00**  | 18.61         | 0.99    | 19.06         | 0.51    |
|                            | F   | 19.60   | 0.42  | 18.13        | 0.39** | 17.67         | 0.78**  | 18.54         | 0.29**  | 18.35         | 0.55**  |
| MCHC (g/dL)                | M   | 34.42   | 0.39  | 33.96        | 0.26   | 31.20         | 0.84**  | 28.64         | 1.52**  | 30.11         | 1.01**  |
|                            | F   | 34.09   | 1.15  | 33.12        | 0.80   | 31.35         | 0.97**  | 29.65         | 1.36**  | 30.30         | 1.60**  |
| PLT&O (10 <sup>9</sup> /L) | M   | 1112.9  | 108.2 | 1136.4       | 124.8  | 1246.3        | 81.4    | 1465.4        | 258.5** | 1637.7        | 260.1** |
|                            | F   | 1081.2  | 118.3 | 1145.4       | 130.0  | 1315.9        | 80.8*   | 1546.0        | 168.1** | 1590.9        | 328.4** |
| PCT (%)                    | M   | 0.80    | 0.08  | 0.85         | 0.08   | 0.95          | 0.05**  | 1.06          | 0.22**  | 1.16          | 0.20**  |
|                            | F   | 0.75    | 0.12  | 0.82         | 0.10   | 0.95          | 0.08*   | 1.07          | 0.13**  | 0.99          | 0.22**  |
| RET% (%)                   | M   | 3.22    | 0.40  | 3.71         | 0.62   | 15.71         | 3.11**  | 15.44         | 6.66**  | 10.67         | 6.69**  |
|                            | F   | 3.87    | 0.80  | 4.77         | 0.95   | 11.88         | 2.06**  | 10.77         | 2.87**  | 9.47          | 6.74**  |
| #RET (10 <sup>9</sup> /L)  | M   | 257.77  | 30.73 | 293.51       | 47.89  | 860.30        | 126.6** | 589.87        | 220.6** | 424.77        | 327.8*  |
|                            | F   | 270.33  | 51.70 | 345.56       | 61.93  | 642.89        | 111.9** | 390.62        | 115.29  | 350.94        | 297.4   |
| RDW-CV (%)                 | M   | 12.24   | 0.42  | 17.49        | 1.45** | 25.67         | 2.49**  | 25.40         | 2.93**  | 23.79         | 2.33**  |
|                            | F   | 10.84   | 0.53  | 13.58        | 0.99*  | 19.05         | 1.10**  | 19.01         | 2.93**  | 20.12         | 3.85**  |
| NRBC% (/100 WBC)           | M   | 0.19    | 0.11  | 2.04         | 1.06** | 81.39         | 34.75** | 142.58        | 59.01** | 136.13        | 45.39** |
|                            | F   | 0.13    | 0.17  | 1.91         | 1.87** | 78.66         | 25.59** | 197.72        | 38.09** | 127.73        | 63.30** |
| #NRBC (10 <sup>9</sup> /L) | M   | 0.01    | 0.01  | 0.14         | 0.08** | 8.15          | 3.89**  | 20.05         | 7.87**  | 19.53         | 5.88**  |
|                            | F   | 0.01    | 0.01  | 0.09         | 0.10** | 4.98          | 2.24**  | 18.37         | 5.58**  | 15.28         | 9.78**  |
| APTT (Sec)                 | M   | 17.15   | 1.68  | 17.62        | 1.13   | 16.70         | 0.71    | 16.42         | 0.69    | 14.69         | 1.06**  |
|                            | F   | 15.86   | 1.47  | 16.11        | 1.74   | 13.86         | 1.75*   | 13.91         | 0.99*   | 13.96         | 0.92*   |
| Fbgc (g/L)                 | M   | 2.46    | 0.23  | 2.49         | 0.15   | 2.40          | 0.17    | 2.70          | 0.25    | 3.63          | 0.24**  |
|                            | F   | 1.95    | 0.21  | 1.85         | 0.17   | 1.98          | 0.26    | 2.08          | 0.21    | 3.07          | 0.56**  |
| TT (Sec)                   | M   | 43.67   | 1.95  | 42.90        | 2.13   | 41.38         | 1.51*   | 37.59         | 1.91**  | 34.33         | 0.94**  |
|                            | F   | 39.46   | 2.07  | 39.46        | 2.25   | 36.47         | 2.80**  | 34.68         | 1.24**  | 32.58         | 0.73**  |

Abbreviations: SD = standard deviation; M = male; F = female; g = gram; kg = kilogram; bw = body weight; d = day; L = liter; dL = deciliter; fL = femtoliter; pg = picogram; % = percent; Sec = seconds; WBC = white blood cells; RBC = red blood cells; HGB = hemoglobin; HCT = hematocrit; MCV = mean corpuscular volume; MCH; mean corpuscular hemoglobin; MCHC; mean corpuscular hemoglobin concentration; PLT&O = platelet count; RDW-CV = red cell distribution width; PCT = platelet crit; NEUT = neutrophiles; LYMPH = lymphocytes; MONO = monocytes; BASO = basophiles; RET% = reticulocytes percent; #RET = reticulocytes absolute; NRBC% = nucleated red blood cells relative; #NRBC = nucleated red blood cells absolute; APTT = activated partial thromboplastin time; Fbgc = fibrinogen; TT = thrombin time; IV = intravenously; IM = intramuscular.

\*p<0.05; \*\*p<0.01

1237  
1238

1239 **Table 9: Haematology and Coagulation Data Dogs (D28), Means ± SD**

| Parameter             | Sex | Control |       | 3 mg/kg/d IV |       | 10 mg/kg/d IM |          | 30 mg/kg/d IV |         | 30 mg/kg/d IM |         |
|-----------------------|-----|---------|-------|--------------|-------|---------------|----------|---------------|---------|---------------|---------|
|                       |     | Mean    | SD    | Mean         | SD    | Mean          | SD       | Mean          | SD      | Mean          | SD      |
| WBC                   | M   | 10.18   | 2.14  | 13.28        | 1.25  | 13.39         | 2.78     | 12.82         | 2.55    | 16.90         | 5.32    |
| (10 <sup>9</sup> /L)  | F   | 11.74   | 2.07  | 13.17        | 2.47  | 14.91         | 3.48     | 15.76         | 2.75    | 19.27         | 8.17    |
| RBC                   | M   | 6.45    | 0.56  | 6.19         | 0.30  | 5.35          | 0.31*    | 4.37          | 0.57**  | 4.13          | 0.26**  |
| (10 <sup>12</sup> /L) | F   | 6.53    | 0.53  | 6.80         | 0.90  | 5.41          | 0.23     | 4.55          | 0.45**  | 4.56          | 0.90**  |
| HGB                   | M   | 14.84   | 1.24  | 14.03        | 0.31  | 11.53         | 0.46**   | 9.48          | 1.23**  | 9.00          | 0.72**  |
| (g/dL)                | F   | 15.26   | 1.26  | 14.83        | 1.60  | 11.87         | 0.42*    | 10.04         | 0.98**  | 9.76          | 1.84**  |
| HCT                   | M   | 44.82   | 3.63  | 42.60        | 0.85  | 36.07         | 1.10**   | 28.96         | 3.64**  | 27.74         | 2.30**  |
| (%)                   | F   | 46.00   | 3.70  | 45.50        | 5.01  | 36.73         | 1.07*    | 31.18         | 2.65**  | 30.06         | 5.30**  |
| MCH                   | M   | 23.00   | 0.75  | 22.70        | 0.62  | 21.60         | 0.61*    | 21.70         | 0.52*   | 21.78         | 0.78*   |
| (pg)                  | F   | 23.40   | 1.39  | 21.87        | 0.95  | 21.97         | 0.51     | 22.08         | 0.65    | 21.44         | 0.72*   |
| MPV                   | M   | 10.16   | 1.21  | 10.67        | 0.76  | 12.27         | 0.38     | 12.84         | 0.54**  | 12.32         | 1.27*   |
| (fL)                  | F   | 10.36   | 0.42  | 10.87        | 0.86  | 11.97         | 0.38*    | 13.30         | 1.11**  | 11.92         | 0.84**  |
| NEUT                  | M   | 4.97    | 0.84  | 7.21         | 1.18  | 7.54          | 1.48     | 6.67          | 1.73    | 7.46          | 3.71    |
| (10 <sup>9</sup> /L)  | F   | 6.46    | 1.43  | 6.59         | 1.42  | 8.70          | 4.16     | 7.93          | 3.58    | 9.06          | 6.50    |
| MONO                  | M   | 1.14    | 0.33  | 1.45         | 0.44  | 2.38          | 0.22*    | 2.74          | 0.98**  | 3.07          | 1.21**  |
| (10 <sup>9</sup> /L)  | F   | 0.95    | 0.18  | 1.24         | 0.40  | 1.20          | 0.96     | 2.66          | 1.12*   | 2.62          | 1.21*   |
| EOS                   | M   | 0.36    | 0.24  | 0.54         | 0.08  | 0.50          | 0.33     | 0.38          | 0.20    | 0.25          | 0.10    |
| (10 <sup>9</sup> /L)  | F   | 0.64    | 0.12  | 0.82         | 0.52  | 0.46          | 0.25     | 0.38          | 0.31    | 0.26          | 0.15    |
| RET%                  | M   | 0.81    | 0.59  | 1.22         | 0.52  | 1.73          | 0.17*    | 0.45          | 0.34    | 0.37          | 0.36    |
| (%)                   | F   | 0.63    | 0.29  | 1.22         | 0.99  | 2.87          | 1.51**   | 0.69          | 0.34    | 0.42          | 0.20    |
| #RET                  | M   | 53.42   | 40.48 | 76.30        | 34.65 | 93.03         | 14.60    | 20.02         | 14.83   | 16.00         | 16.90** |
| (10 <sup>9</sup> /L)  | F   | 41.28   | 19.53 | 87.90        | 77.58 | 156.87        | 88.13*   | 30.76         | 13.06   | 18.68         | 9.67    |
| NRBC%                 | M   | 0.04    | 0.05  | 1.10         | 0.92* | 220.90        | 108.93** | 82.76         | 63.74** | 26.10         | 42.90** |
| (/100 WBC)            | F   | 0.10    | 0.10  | 0.43         | 0.21  | 208.27        | 79.25**  | 126.12        | 60.16** | 47.08         | 46.93** |
| #NRBC                 | M   | 0.004   | 0.005 | 0.16         | 0.14  | 27.56         | 10.14**  | 11.51         | 11.38   | 5.30          | 8.79    |
| (10 <sup>9</sup> /L)  | F   | 0.01    | 0.01  | 0.06         | 0.03  | 30.00         | 11.29**  | 20.93         | 12.21** | 7.61          | 7.99**  |
| Fbgc                  | M   | 2.08    | 0.38  | 2.01         | 0.35  | 2.48          | 0.44     | 2.87          | 0.32*   | 3.24          | 1.01*   |
| (g/L)                 | F   | 1.73    | 0.45  | 1.59         | 0.29  | 1.99          | 0.10     | 2.89          | 0.82*   | 2.85          | 0.92    |

Abbreviations: SD = standard deviation; M = male; F = female; g = gram; kg = kilogram; bw = body weight; d = day; L = liter; dL = deciliter; fL = femtoliter; % = percent; WBC = white blood cells; RBC = red blood cells; HGB = hemoglobin; HCT = hematocrit; MPV = mean platelet volume; NEUT = neutrophils; MONO = monocytes; RET% = reticulocytes percent; #RET = reticulocytes absolute; NRBC% = nucleated red blood cells relative; #NRBC = nucleated red blood cells absolute; Fbgc = fibrinogen; IV = intravenously; IM = intramuscular.

\*p<0.05; \*\*p<0.01

1240

1241 **Table 10: Clinical Chemistry Data Rats (D29), Means ± SD**

| Parameter | Sex | Control           |       | 3 mg/kg/d IV      |       | 10 mg/kg/d IM     |        | 30 mg/kg/d IV     |        | 30 mg/kg/d IM     |         |
|-----------|-----|-------------------|-------|-------------------|-------|-------------------|--------|-------------------|--------|-------------------|---------|
|           |     | Mean              | SD    | Mean              | SD    | Mean              | SD     | Mean              | SD     | Mean              | SD      |
| AST       | M   | 121.10            | 28.40 | 116.60            | 26.18 | 124.40            | 29.80  | 161.40            | 51.66  | 151.40            | 36.35   |
| (U/L)     | F   | 105.67            | 22.55 | 113.56            | 37.82 | 106.30            | 24.56  | 103.10            | 11.74  | 143.10            | 45.40   |
| ALP       | M   | 146.60            | 21.04 | 141.30            | 28.99 | 143.10            | 23.00  | 123.90            | 25.27  | 104.90            | 17.51** |
| (U/L)     | F   | 74.22             | 18.01 | 74.44             | 16.26 | 70.70             | 11.93  | 55.60             | 8.63*  | 53.70             | 7.04**  |
| CHOL      | M   | 1.75              | 0.32  | 1.59              | 0.29  | 1.38              | 0.30*  | 1.42              | 0.23*  | 1.35              | 0.26**  |
| (mmol/L)  | F   | 1.80              | 0.50  | 1.92              | 0.45  | 1.84              | 0.43   | 1.83              | 0.32   | 1.72              | 0.29**  |
| TG        | M   | 0.10              | 0.03  | 0.10              | 0.02  | 0.14              | 0.07   | 0.14              | 0.03   | 0.20              | 0.07**  |
| (mmol/L)  | F   | 0.11              | 0.03  | 0.13              | 0.04  | 0.11              | 0.03   | 0.16              | 0.14   | 0.17              | 0.07    |
| T-BIL     | M   | 0.61 <sup>n</sup> | 0.15  | 0.94 <sup>n</sup> | 0.51  | 1.69 <sup>n</sup> | 0.53   | 2.91 <sup>n</sup> | 0.83   | 2.15 <sup>n</sup> | 0.51    |
| (µmol/L)  | F   | 1.05              | 0.30  | 1.73              | 0.61* | 2.45              | 0.45** | 3.03              | 0.66** | 2.63              | 1.37**  |
| D-BIL     | M   | 0.46 <sup>n</sup> | -     | 0.39 <sup>n</sup> | 0.04  | 0.77 <sup>n</sup> | 0.30   | 1.22 <sup>n</sup> | 0.48   | 0.99 <sup>n</sup> | 0.34    |
| (µmol/L)  | F   | 0.43              | 0.10  | 0.59              | 0.17  | 0.82              | 0.14*  | 1.01              | 0.36** | 0.93              | 0.56*   |
| BUN       | M   | 4.64              | 0.52  | 4.60              | 0.55  | 4.71              | 0.65   | 5.22              | 0.41   | 5.46              | 1.46    |
| (mmol/L)  | F   | 5.07              | 0.41  | 5.05              | 0.54  | 5.25              | 0.60   | 6.17              | 0.98*  | 6.76              | 1.50**  |
| P         | M   | 2.66              | 0.21  | 2.59              | 0.19  | 2.91              | 0.29   | 2.97              | 0.24*  | 3.01              | 0.27**  |
| (mmol/L)  | F   | 2.68              | 0.32  | 2.66              | 0.24  | 2.83              | 0.28   | 2.86              | 0.40   | 2.70              | 0.25    |
| TP        | M   | 57.80             | 2.49  | 59.10             | 1.52  | 58.30             | 2.87   | 59.80             | 3.01   | 58.20             | 3.08    |
| (g/L)     | F   | 64.11             | 4.26  | 68.00             | 2.96* | 65.50             | 4.06   | 67.00             | 2.75   | 61.80             | 1.62    |
| ALB       | M   | 37.80             | 1.87  | 38.70             | 1.77  | 38.90             | 2.13   | 39.50             | 1.84   | 36.30             | 2.11    |
| (g/L)     | F   | 47.33             | 3.81  | 50.22             | 3.23  | 48.80             | 3.29   | 49.80             | 2.74   | 41.90             | 2.47**  |
| GLO       | M   | 20.00             | 1.56  | 20.40             | 1.35  | 19.40             | 1.58   | 20.30             | 1.64   | 21.90             | 1.45*   |
| (g/L)     | F   | 16.78             | 1.39  | 17.78             | 0.97  | 16.70             | 1.25   | 17.20             | 1.23   | 19.90             | 1.52**  |
| A/G       | M   | 1.90              | 0.19  | 1.91              | 0.19  | 2.02              | 0.20   | 1.95              | 0.13   | 1.66              | 0.10**  |
|           | F   | 2.84              | 0.30  | 2.84              | 0.29  | 2.93              | 0.22   | 2.91              | 0.29   | 2.12              | 0.27**  |
| TBA       | M   | 9.39              | 4.64  | 9.03              | 3.54  | 12.14             | 4.50   | 16.15             | 9.93   | 25.36             | 20.85*  |
| (µmol/L)  | F   | 10.90             | 6.06  | 12.76             | 10.55 | 11.08             | 7.05   | 22.24             | 17.92  | 22.11             | 17.36   |

Abbreviations: SD = standard deviation; M = male; F = female; g = gram; kg = kilogram; bw = body weight; d = day; L = liter; U = units; mmol = millimole; µmol = micromole; ALT = alanine aminotransferase; AST = aspartate aminotransferase; CHOL = total cholesterol; TG = triglycerides; T-BIL = total bilirubin; D-BIL = direct bilirubin; BUN = blood urea nitrogen; K = kalium; P = phosphate; TP = total protein; ALB = albumin; GLO = globulin; A/G = albumin/globulin ratio; TBA= total bile acids; IV = intravenously; IM = intramuscular.

<sup>n</sup> = inappropriate for statistics; \*p<0.05; \*\*p<0.01

1242



1243 **Table 11: Clinical Chemistry Data Dogs (D28), Means ± SD**

| Parameter | Sex | Control |        | 3 mg/kg/d IV |       | 10 mg/kg/d IM |        | 30 mg/kg/d IV |         | 30 mg/kg/d IM |          |
|-----------|-----|---------|--------|--------------|-------|---------------|--------|---------------|---------|---------------|----------|
|           |     | Mean    | SD     | Mean         | SD    | Mean          | SD     | Mean          | SD      | Mean          | SD       |
| ALT       | M   | 29.80   | 9.36   | 36.67        | 9.45  | 20.67         | 3.79   | 23.20         | 2.39    | 36.00         | 8.86     |
| (U/L)     | F   | 29.80   | 3.90   | 27.67        | 4.16  | 29.00         | 6.00   | 19.80         | 6.94    | 41.60         | 11.19    |
| AST       | M   | 29.60   | 3.13   | 29.00        | 3.00  | 27.67         | 2.31   | 32.00         | 5.24    | 61.40         | 31.28*   |
| (U/L)     | F   | 25.60   | 5.03   | 27.33        | 3.79  | 26.00         | 2.65   | 37.00         | 7.68*   | 65.80         | 33.52**  |
| ALP       | M   | 89.00   | 18.72  | 98.67        | 33.08 | 80.67         | 44.38  | 84.80         | 7.05    | 119.40        | 45.11    |
| (U/L)     | F   | 79.00   | 15.86  | 50.00        | 17.35 | 75.67         | 6.11   | 107.60        | 27.68   | 161.60        | 100.2*   |
| CK        | M   | 171.20  | 34.30  | 185.33       | 68.06 | 182.00        | 61.83  | 154.00        | 40.24   | 655.00        | 631.89   |
| (U/L)     | F   | 136.20  | 43.80  | 152.00       | 19.16 | 168.00        | 38.31  | 287.80        | 50.33** | 680.80        | 540.5**  |
| T-BIL     | M   | 0.83    | 0.34   | 0.67         | 0.12  | 1.06          | 0.25   | 1.92          | 0.42**  | 1.31          | 0.39     |
| (µmol/L)  | F   | 0.72    | 0.20   | 0.97         | 0.51  | 1.10          | 0.11   | 2.15          | 0.57**  | 1.31          | 0.60     |
| D-BIL     | M   | N/A     | N/A    | 0.40         | N/A   | N/A           | N/A    | 0.51          | 0.11    | 0.54          | 0.17     |
| (µmol/L)  | F   | N/A     | N/A    | N/A          | N/A   | N/A           | N/A    | 0.70          | 0.38    | 0.46          | 0.08     |
| CREA      | M   | 56.60   | 4.93   | 53.67        | 7.37  | 50.67         | 2.31   | 50.40         | 4.04    | 39.80         | 7.43**   |
| (µmol/L)  | F   | 55.40   | 2.88   | 52.33        | 17.04 | 47.67         | 5.03   | 45.60         | 3.51    | 41.00         | 7.38     |
| K         | M   | 4.90    | 0.14   | 4.96         | 0.26  | 4.68          | 0.12   | 4.58          | 0.33    | 4.46          | 0.26*    |
| (mmol/L)  | F   | 4.95    | 0.14   | 4.85         | 0.13  | 4.74          | 0.13   | 4.87          | 0.35    | 4.54          | 0.27     |
| Ca        | M   | 2.49    | 0.10   | 2.53         | 0.05  | 2.44          | 0.05   | 2.43          | 0.04    | 2.38          | 0.09     |
| (mmol/L)  | F   | 2.58    | 0.04   | 2.55         | 0.08  | 2.42          | 0.09*  | 2.44          | 0.10**  | 2.39          | 0.06**   |
| ALB       | M   | 31.80   | 3.27   | 30.67        | 1.53  | 30.33         | 1.53   | 29.00         | 1.87    | 25.80         | 1.92**   |
| (g/L)     | F   | 32.80   | 1.64   | 31.67        | 3.51  | 29.67         | 0.58   | 29.80         | 1.10    | 26.60         | 3.91**   |
| GLO       | M   | 31.00   | 1.41   | 30.33        | 2.52  | 34.00         | 3.46   | 35.80         | 3.35    | 41.00         | 3.08**   |
| (g/L)     | F   | 29.80   | 0.84   | 32.33        | 3.51  | 31.33         | 3.79   | 35.80         | 2.49    | 35.60         | 7.09     |
| A/G       | M   | 1.03    | 0.14   | 1.02         | 0.12  | 0.90          | 0.14   | 0.82          | 0.10*   | 0.63          | 0.07**   |
|           | F   | 1.10    | 0.06   | 0.99         | 0.19  | 0.96          | 0.14   | 0.84          | 0.08    | 0.79          | 0.25     |
| AMY       | M   | 738.22  | 170.13 | 707.90       | 24.26 | 831.53        | 123.65 | 857.62        | 144.29  | 908.80        | 104.74   |
| (U/L)     | F   | 625.80  | 50.75  | 677.57       | 81.52 | 791.23        | 153.65 | 709.38        | 117.39  | 903.90        | 114.52** |
| LDH       | M   | 80.20   | 19.74  | 109.67       | 41.31 | 149.00        | 67.29  | 115.00        | 51.87   | 151.20        | 55.20    |
| (U/L)     | F   | 81.40   | 32.00  | 79.67        | 26.10 | 20.67         | 3.79   | 329.60        | 111.2** | 246.80        | 86.14**  |

Abbreviations: SD = standard deviation; M = male; F = female; N/A = not available; g = gram; kg = kilogram; bw = body weight; d = day; L = liter; U = units; mmol = millimole; µmol = micromole; ALT = alanine aminotransferase; AST = aspartate aminotransferase; ALP = alkaline phosphatase; CK = creatin kinase; T-BIL = total bilirubin; D-BIL = direct bilirubin; CREA = creatinine; K = kalium; Ca = calcium; ALB = albumin; GLO = globulin; A/G = albumin/globulin ratio; AMY = amylase; LDH = lactate dehydrogenase; IV = intravenously; IM = intramuscular.

\*p<0.05; \*\*p<0.01

1244

1245 **Table 12: Organ Weights Rats (D29), Means ± SD (n=10/sex/group)**

| Parameter           | Sex | Control |       | 3 mg/kg/d IV |       | 10 mg/kg/d IV |        | 30 mg/kg/d IV |        | 30 mg/kg/d IM |         |
|---------------------|-----|---------|-------|--------------|-------|---------------|--------|---------------|--------|---------------|---------|
|                     |     | Mean    | SD    | Mean         | SD    | Mean          | SD     | Mean          | SD     | Mean          | SD      |
| Terminal bw (kg)    | M   | 338.7   | 10.30 | 338.8        | 15.86 | 341.3         | 13.94  | 326.6         | 21.55  | 293.5         | 28.92** |
|                     | F   | 236.5   | 16.95 | 240.0        | 20.68 | 241.2         | 16.90  | 231.4         | 18.64  | 219.6         | 17.73   |
| Heart abs (g)       | M   | 1.30    | 0.12  | 1.30         | 0.10  | 1.46          | 0.18   | 1.52          | 0.21** | 1.24          | 0.13    |
|                     | F   | 0.93    | 0.06  | 0.96         | 0.09  | 0.98          | 0.07   | 1.03          | 0.11   | 0.94          | 0.11    |
| Heart to bw (%)     | M   | 0.38    | 0.03  | 0.38         | 0.03  | 0.43          | 0.05   | 0.47          | 0.07** | 0.42          | 0.04    |
|                     | F   | 0.39    | 0.02  | 0.40         | 0.03  | 0.41          | 0.02   | 0.44          | 0.04   | 0.43          | 0.04    |
| Heart to brain (%)  | M   | 65.11   | 6.13  | 64.34        | 5.05  | 70.72         | 7.96   | 74.71         | 10.48* | 62.0          | 7.12    |
|                     | F   | 48.02   | 4.17  | 48.96        | 4.39  | 50.58         | 4.25   | 53.53         | 6.22   | 50.03         | 4.74    |
| Liver abs (g)       | M   | 8.76    | 0.42  | 9.01         | 1.04  | 9.21          | 0.77   | 9.60          | 0.65   | 9.12          | 1.09    |
|                     | F   | 6.80    | 0.72  | 7.43         | 1.26  | 7.19          | 0.68   | 7.85          | 1.10   | 7.40          | 0.60    |
| Liver to bw (%)     | M   | 2.59    | 0.08  | 2.65         | 0.21  | 2.70          | 0.18   | 2.94          | 0.12** | 3.10          | 0.14**  |
|                     | F   | 2.89    | 0.41  | 3.09         | 0.43  | 2.98          | 0.12   | 3.38          | 0.27   | 3.37          | 0.14    |
| Liver to brain (%)  | M   | 437.96  | 23.62 | 445.68       | 55.25 | 445.44        | 28.24  | 471.55        | 37.60  | 457.79        | 59.68   |
|                     | F   | 349.90  | 34.26 | 379.41       | 60.49 | 371.10        | 38.11  | 409.89        | 63.62  | 394.28        | 24.46   |
| Spleen abs (g)      | M   | 0.69    | 0.05  | 0.70         | 0.12  | 1.59          | 0.31** | 3.33          | 0.87** | 2.72          | 0.83**  |
|                     | F   | 0.56    | 0.10  | 0.57         | 0.10  | 1.04          | 0.19** | 2.09          | 0.63** | 1.85          | 0.40**  |
| Spleen to bw (%)    | M   | 0.20    | 0.02  | 0.21         | 0.03  | 0.47          | 0.09** | 1.01          | 0.21** | 0.91          | 0.23**  |
|                     | F   | 0.24    | 0.05  | 0.24         | 0.03  | 0.43          | 0.08** | 0.90          | 0.24** | 0.86          | 0.22**  |
| Spleen to brain (%) | M   | 34.47   | 3.01  | 34.41        | 6.31  | 76.94         | 13.20* | 163.42        | 40.06* | 136.69        | 42.66** |
|                     | F   | 28.93   | 5.63  | 28.91        | 5.06  | 53.67         | 9.38** | 109.27        | 33.69* | 99.02         | 21.48** |

Abbreviations: SD = standard deviation; M = male; F = female; abs = absolute; bw = body weight; d = day; g = gram; mg = milligram; kg = kilogram; IV = intravenously; IM = intramuscular; % = percentage.  
\*p<0.05; \*\*p<0.01

1246

1247 **Table 13: Organ Weights Dogs (D28), Means ± SD (n=3/sex/group)**

| Parameter           | Sex | Control |       | 3 mg/kg/d IV |        | 10 mg/kg/d IM |       | 30 mg/kg/d IV |        | 30 mg/kg/d IM |       |
|---------------------|-----|---------|-------|--------------|--------|---------------|-------|---------------|--------|---------------|-------|
|                     |     | Mean    | SD    | Mean         | SD     | Mean          | SD    | Mean          | SD     | Mean          | SD    |
| Terminal bw (kg)    | M   | 9.93    | 0.67  | 9.60         | 0.26   | 9.97          | 0.42  | 9.50          | 0.26   | 10.00         | 0.72  |
|                     | F   | 9.73    | 0.40  | 9.43         | 0.23   | 9.50          | 0.62  | 9.37          | 0.32   | 9.03          | 0.55  |
| Heart abs (g)       | M   | 83.60   | 3.70  | 90.07        | 3.57   | 86.20         | 4.16  | 82.30         | 10.98  | 80.57         | 11.50 |
|                     | F   | 88.00   | 11.63 | 69.27        | 4.71   | 68.77         | 8.49  | 67.70         | 7.33   | 67.53         | 12.49 |
| Heart to bw (%)     | M   | 0.85    | 0.08  | 0.94         | 0.05   | 0.87          | 0.08  | 0.87          | 0.11   | 0.80          | 0.06  |
|                     | F   | 0.90    | 0.08  | 0.74         | 0.06   | 0.72          | 0.05  | 0.73          | 0.10   | 0.75          | 0.13  |
| Heart to brain (%)  | M   | 106.77  | 4.70  | 116.89       | 9.05   | 108.97        | 10.81 | 106.85        | 12.27  | 100.68        | 14.37 |
|                     | F   | 124.27  | 5.86  | 100.12       | 14.24* | 98.43         | 7.45* | 87.73         | 9.79** | 95.49         | 8.18* |
| Liver abs (g)       | M   | 237.00  | 9.40  | 254.53       | 26.82  | 292.93        | 14.25 | 299.37        | 12.03  | 316.70        | 16.99 |
|                     | F   | 306.13  | 20.33 | 277.97       | 29.73  | 274.90        | 15.59 | 298.17        | 28.98  | 291.50        | 40.56 |
| Liver to bw (%)     | M   | 2.39    | 0.10  | 2.65         | 0.23   | 2.95          | 0.25  | 3.15          | 0.05   | 3.17          | 0.10  |
|                     | F   | 3.15    | 0.27  | 2.95         | 0.29   | 2.90          | 0.19  | 3.18          | 0.21   | 3.22          | 0.26  |
| Liver to brain (%)  | M   | 302.70  | 12.52 | 331.30       | 51.55  | 370.40        | 38.11 | 389.02        | 5.26   | 395.80        | 23.11 |
|                     | F   | 436.10  | 54.95 | 398.62       | 23.56  | 395.36        | 33.24 | 386.51        | 41.07  | 416.86        | 68.56 |
| Spleen abs (g)      | M   | 26.57   | 4.01  | 27.53        | 4.90   | 52.33         | 7.33  | 55.83         | 16.21  | 61.07         | 11.24 |
|                     | F   | 23.80   | 4.78  | 23.87        | 3.13   | 61.83         | 33.58 | 97.87         | 23.80  | 46.60         | 4.59  |
| Spleen to bw (%)    | M   | 0.27    | 0.02  | 0.29         | 0.05   | 0.52          | 0.05  | 0.59          | 0.16   | 0.61          | 0.07  |
|                     | F   | 0.24    | 0.05  | 0.25         | 0.04   | 0.64          | 0.32  | 1.05          | 0.29   | 0.52          | 0.08  |
| Spleen to brain (%) | M   | 33.94   | 5.26  | 35.86        | 7.59   | 65.85         | 7.83  | 72.35         | 19.34  | 76.31         | 14.06 |
|                     | F   | 33.78   | 7.19  | 34.27        | 3.66   | 88.67         | 47.50 | 126.48        | 29.11  | 66.59         | 8.52  |
|                     | F   | 1.01    | 0.43  | 1.31         | 0.24   | 1.34          | 0.18  | 1.28          | 0.26   | 1.53          | 0.31  |

Abbreviations: SD = standard deviation; M = male; F = female; abs = absolute; bw = body weight; d = day; g = gram; mg = milligram; kg = kilogram; IV = intravenously; IM = intramuscular; % = percentage.

\*p<0.05; \*\*p<0.01

1248

1249 **Table 14: Toxicokinetic Parameters in Rats (D1 and D28)**

| Parameter                       | Sex | Day | 3 mg/kg/d IV        |      | 10 mg/kg/d IM       |     | 30 mg/kg/d IV       |      | 30 mg/kg/d IM |      |
|---------------------------------|-----|-----|---------------------|------|---------------------|-----|---------------------|------|---------------|------|
|                                 |     |     | Mean                | SD   | Mean                | SD  | Mean                | SD   | Mean          | SD   |
| <b>Artesunate</b>               |     |     |                     |      |                     |     |                     |      |               |      |
| C <sub>max</sub> (ng/mL)        | F   | 1   | 467 <sup>a</sup>    | 174  | 2296 <sup>a</sup>   | 693 | 14413 <sup>a</sup>  | 4151 | 12300         | 3620 |
|                                 |     | 28  | 287                 | 197  | 999                 | 326 | 13400               | 4360 | 5030          | 2140 |
|                                 | M   | 1   | 341 <sup>a</sup>    | 72   | 1395 <sup>a</sup>   | 516 | 19777 <sup>a</sup>  | 6941 | 6140          | 1460 |
|                                 |     | 28  | 770                 | 583  | 2230                | 856 | 13200               | 3850 | 4920          | 1480 |
| T <sub>max</sub> (hr)           | F   | 1   | 0.0830 <sup>a</sup> | N/A  | 0.0830 <sup>a</sup> | N/A | 0.0830 <sup>a</sup> | N/A  | 0.0830        | N/A  |
|                                 |     | 28  | 0.0830              | N/A  | 0.0830              | N/A | 0.0830              | N/A  | 0.0830        | N/A  |
|                                 | M   | 1   | 0.0830 <sup>a</sup> | N/A  | 0.0830 <sup>a</sup> | N/A | 0.0830 <sup>a</sup> | N/A  | 0.0830        | N/A  |
|                                 |     | 28  | 0.0830              | N/A  | 0.0830              | N/A | 0.0830              | N/A  | 0.0830        | N/A  |
| AUC <sub>(0-t)</sub> (hr*ng/mL) | F   | 1   | NC                  | NC   | NC                  | NC  | NC                  | NC   | 3970          | 912  |
|                                 |     | 28  | 98.4                | 72.7 | 313                 | 100 | 7680                | 2940 | 1540          | 555  |
|                                 | M   | 1   | NC                  | NC   | NC                  | NC  | NC                  | NC   | 3120          | 470  |
|                                 |     | 28  | 405                 | 347  | 1070                | 448 | 6180                | 2700 | 1780          | 80.8 |
| <b>Dihydroartemisinin</b>       |     |     |                     |      |                     |     |                     |      |               |      |
| C <sub>max</sub> (ng/mL)        | F   | 1   | 569                 | 90.2 | 2190                | 124 | 7680                | 944  | 3240          | 567  |
|                                 |     | 28  | 408                 | 113  | 1610                | 238 | 7260                | 1440 | 1660          | 483  |
|                                 | M   | 1   | 546                 | 73.5 | 1680                | 613 | 5650                | 641  | 2020          | 276  |
|                                 |     | 28  | 575                 | 126  | 1960                | 408 | 5460                | 1290 | 1180          | 351  |
| T <sub>max</sub> (hr)           | F   | 1   | 0.0830              | N/A  | 0.0830              | N/A | 0.0830              | N/A  | 0.0830        | N/A  |
|                                 |     | 28  | 0.0830              | N/A  | 0.0830              | N/A | 0.0830              | N/A  | 0.0830        | N/A  |
|                                 | M   | 1   | 0.0830              | N/A  | 0.0830              | N/A | 0.0830              | N/A  | 0.500         | N/A  |
|                                 |     | 28  | 0.0830              | N/A  | 0.0830              | N/A | 0.0830              | N/A  | 0.167         | N/A  |

| Parameter                          | Sex |    | 3 mg/kg/d |      | 10 mg/kg/d |      | 30 mg/kg/d |     | 30 mg/kg/d |      |
|------------------------------------|-----|----|-----------|------|------------|------|------------|-----|------------|------|
|                                    |     |    | IV        |      | IM         |      | IV         |     | IM         |      |
| AUC <sub>(0-t)</sub><br>(hr*ng/mL) | F   | 1  | 227       | 41.6 | 911        | 40.8 | 3340       | 416 | 2310       | 574  |
|                                    |     | 28 | 153       | 26.0 | 526        | 95.7 | 2220       | 479 | 914        | 332  |
|                                    | M   | 1  | 198       | 19.1 | 737        | 214  | 2770       | 597 | 2470       | 400  |
|                                    |     | 28 | 224       | 31.7 | 651        | 167  | 1960       | 703 | 915        | 69.7 |

1250 Abbreviations: AUC<sub>(0-t)</sub> = area under the concentration time curve to the last time point; C<sub>max</sub> = maximum plasma concentration;  
 1251 t<sub>max</sub> = time point of C<sub>max</sub>; SD = standard deviation; M = male; F = female; N/A = not available; NC = not calculated; ng =  
 1252 nanogram; mL = milliliter; hr = hours.

1253 <sup>a</sup>. observed at T<sub>max</sub> (calculation not possible, other time points below quantitative lower limit of 10.00 ng/mL).  
 1254  
 1255

1256 **Table 15: Toxicokinetic Parameters in Dogs (D1 and D27)**

| Parameter                          | Sex | Day | 3 mg/kg/d |      | 10 mg/kg/d |      | 30 mg/kg/d |      | 30 mg/kg/d |      |
|------------------------------------|-----|-----|-----------|------|------------|------|------------|------|------------|------|
|                                    |     |     | IV        |      | IM         |      | IV         |      | IM         |      |
|                                    |     |     | Mean      | SD   | Mean       | SD   | Mean       | SD   | Mean       | SD   |
| <b>Artesunate</b>                  |     |     |           |      |            |      |            |      |            |      |
| C <sub>max</sub><br>(ng/mL)        | F   | 1   | 2170      | 445  | 10200      | 1150 | 53600      | 7540 | 19300      | 5250 |
|                                    |     | 27  | 2890      | 1180 | 6940       | 1270 | 63900      | 6000 | 8070       | 4060 |
|                                    | M   | 1   | 1740      | 461  | 12100      | 350  | 50200      | 5580 | 14400      | 5840 |
|                                    |     | 27  | 2210      | 339  | 10100      | 2290 | 61700      | 9620 | 4890       | 2920 |
| T <sub>max</sub><br>(hr)           | F   | 1   | 0.0830    | N/A  | 0.0830     | N/A  | 0.0830     | N/A  | 0.0830     | N/A  |
|                                    |     | 27  | 0.0830    | N/A  | 0.0830     | N/A  | 0.0830     | N/A  | 0.250      | N/A  |
|                                    | M   | 1   | 0.0830    | N/A  | 0.0830     | N/A  | 0.0830     | N/A  | 0.0830     | N/A  |
|                                    |     | 27  | 0.0830    | N/A  | 0.0830     | N/A  | 0.0830     | N/A  | 0.0830     | N/A  |
| AUC <sub>(0-t)</sub><br>(hr*ng/mL) | F   | 1   | 797       | 182  | 3740       | 363  | 18800      | 2670 | 10700      | 1500 |
|                                    |     | 27  | 878       | 400  | 1880       | 398  | 16800      | 1600 | 6870       | 626  |
|                                    | M   | 1   | 621       | 165  | 4310       | 198  | 17600      | 1830 | 9510       | 241  |
|                                    |     | 27  | 632       | 115  | 2740       | 632  | 16900      | 2540 | 4360       | 1440 |
| <b>Dihydroartemisinin</b>          |     |     |           |      |            |      |            |      |            |      |
| C <sub>max</sub><br>(ng/mL)        | F   | 1   | 685       | 73.0 | 1520       | 132  | 3800       | 420  | 2680       | 881  |
|                                    |     | 27  | 590       | 99.5 | 1770       | 199  | 5380       | 513  | 1890       | 567  |
|                                    | M   | 1   | 829       | 157  | 2220       | 336  | 4740       | 902  | 2740       | 791  |
|                                    |     | 27  | 928       | 224  | 2020       | 161  | 4780       | 1030 | 1510       | 666  |
| T <sub>max</sub><br>(hr)           | F   | 1   | 0.0830    | N/A  | 0.0830     | N/A  | 0.0830     | N/A  | 0.500      | N/A  |
|                                    |     | 27  | 0.0830    | N/A  | 0.0830     | N/A  | 0.250      | N/A  | 0.500      | N/A  |
|                                    | M   | 1   | 0.0830    | N/A  | 0.0830     | N/A  | 0.0830     | N/A  | 0.500      | N/A  |
|                                    |     | 27  | 0.0830    | N/A  | 0.0830     | N/A  | 0.250      | N/A  | 0.500      | N/A  |
| AUC <sub>(0-t)</sub><br>(hr*ng/mL) | F   | 1   | 298       | 50.1 | 921        | 228  | 3470       | 401  | 3580       | 784  |
|                                    |     | 27  | 272       | 78.4 | 921        | 151  | 3100       | 392  | 3530       | 822  |
|                                    | M   | 1   | 368       | 102  | 1420       | 70.1 | 3880       | 630  | 4020       | 827  |
|                                    |     | 27  | 384       | 68.5 | 1310       | 91.4 | 3320       | 387  | 2800       | 685  |

1257 Abbreviations: AUC<sub>(0-t)</sub> = area under the concentration time curve to the last time point; C<sub>max</sub> = maximum plasma concentration;  
 1258 t<sub>max</sub> = time point of C<sub>max</sub>; SD = standard deviation; M = male; F = female; N/A = not available; ng = nanogram; mL = milliliter;  
 1259 hr = hours.

1260
